# Supplementary material for: The effect of meat processing methods on changes in disulfide bonding and alteration of protein structures: impact on protein digestion products
Source: Royal Society of Chemistry journal article supplement (doi:10.1039/c8ra02310g), 2018-01-01
Supplement: c8ra02310g1.pdf [file c8ra02310g1.pdf]

Table S1 Comparing relative band intensities of whole proteins in different pork products treated without (-βME) 5%βME (mean±standard deviations, n=7)

| Bands | Raw pork    | Cooked pork | Emulsion-type sausage | Dry-cured pork | Stewed pork |
|-------|-------------|-------------|-----------------------|----------------|-------------|
| 1     | 2.61±1.53a  | 3.67±1.34a  | 3.72±1.10a            | 3.59±1.05a     | 3.12±1.27a  |
| 2     | 4.3±2.22a   | 3.72±1.68a  | 3.66±0.99a            | 2.93±1.58a     | 3.02±1.58a  |
| 3     | 0.13±0.09ab | 0.13±0.12ab | 0.17±0.13ab           | 0.03±0.03b     | 0.23±0.19a  |
| 4     | 1.07±0.41a  | 0.66±0.47ab | 0.69±0.39ab           | 0.59±0.48b     | nd          |
| 5     | 2.62±1.33a  | 0.11±0.07b  | 0.28±0.28b            | 0.13±0.14b     | nd          |
| 6     | 0.28±0.21a  | 0.10±0.05b  | 0.32±0.14a            | 0.02±0.01b     | nd          |
| 7     | 0.27±0.13a  | 0.08±0.03bc | 0.13±0.07b            | 0.05±0.03cd    | nd          |
| 8     | 0.20±0.08b  | 0.30±0.18ab | 0.37±0.17a            | 0.07±0.03c     | 0.05±0.04c  |
| 9     | 0.02±0.02b  | 0.10±0.02a  | 0.15±0.11a            | 0.02±0.01b     | 0.04±0.03b  |
| 10    | 0.99±0.26a  | 0.26±0.14a  | 0.44±0.20b            | 0.46±0.21b     | 0.02±0.02c  |
| 11    | 1.83±0.23a  | 0.66±0.45b  | 0.77±0.53b            | 0.61±0.42b     | 0.05±0.04c  |
| 12    | 0.48±0.26a  | 0.22±0.12b  | 0.19±0.07bc           | 0.14±0.06bc    | 0.046±0.03c |
| 13    | 0.18±0.12a  | 0.09±0.06bc | 0.03±0.01c            | 0.07±0.04bc    | 0.12±0.04ab |
| 14    | 1.73±0.29a  | 0.29±0.20c  | 0.66±0.48b            | 0.99±0.33b     | 0.04±0.04c  |
| 15    | 0.40±0.10ab | 0.16±0.11bc | 0.27±0.30bc           | 0.67±0.61a     | 0.04±0.02c  |
| 16    | 0.05±0.04b  | 0.03±0.02b  | 0.03±0.02b            | 0.11±0.08a     | 0.02±0.01b  |
| 17    | 1.02±0.20a  | 0.44±0.29b  | 0.75±0.31a            | 0.75±0.30a     | 0.06±0.03c  |
| 18    | 1.96±0.52a  | 0.99±0.53bc | 1.04±0.14bc           | 1.59±0.62ab    | 0.87±0.76c  |
| 19    | 4.26±1.53a  | 3.23±0.95a  | 2.92±0.50a            | 3.56±1.38a     | 1.11±1.26b  |
| 20    | 1.7±0.86a   | 1.43±0.63ab | 1.58±0.33a            | 0.85±0.45bc    | 0.34±0.29c  |
| 21    | 0.90±0.51a  | 0.67±0.29ab | 0.54±0.23ab           | 0.77±0.37ab    | 0.41±0.29b  |
| 22    | 0.95±0.61a  | 1.00±0.60a  | 0.99±0.54a            | 0.63±0.54ab    | 0.29±0.30b  |
| 23    | 0.27±0.20ab | 0.27±0.13ab | 0.30±0.12ab           | 0.39±0.32a     | 0.09±0.07b  |
| 24    | 0.63±0.38a  | 0.38±0.17ab | 0.34±0.10b            | 0.38±0.27ab    | 0.14±0.05b  |
| 25    | 1.36±0.32a  | 0.97±0.55a  | 0.94±0.18a            | 1.39±0.84a     | 0.37±0.24b  |
| 26    | 0.19±0.05a  | 0.30±0.35a  | 0.25±0.12a            | 0.29±0.33a     | 0.36±0.27a  |

a,b,c, Different letters on the same row indicate significant difference ( $P < 0.05$ )

Table S2 Comparing relative band intensities of whole proteins treated with (+ $\beta$ ME) 5% $\beta$ ME in different pork products (mean $\pm$ standard deviations, n=7)

| Bands | Raw pork           | Cooked pork       | Emulsion-type sausage | Dry-cured pork    | Stewed pork       |
|-------|--------------------|-------------------|-----------------------|-------------------|-------------------|
| 1     | 1.17 $\pm$ 0.68b   | 1.99 $\pm$ 0.62ab | 1.43 $\pm$ 0.55b      | 1.97 $\pm$ 0.41ab | 2.53 $\pm$ 1.26a  |
| 2     | 6.41 $\pm$ 1.72a   | 2.50 $\pm$ 0.97b  | 1.01 $\pm$ 1.12b      | 1.94 $\pm$ 1.79b  | 2.29 $\pm$ 1.64b  |
| 3     | 0.04 $\pm$ 0.025ab | 0.05 $\pm$ 0.02ab | 0.07 $\pm$ 0.04a      | 0.02 $\pm$ 0.01c  | 0.03 $\pm$ 0.03c  |
| 4     | 2.30 $\pm$ 0.85a   | 1.64 $\pm$ 0.81a  | 1.53 $\pm$ 0.72a      | 2.07 $\pm$ 1.08a  | n.d.              |
| 5     | 3.01 $\pm$ 1.21a   | 0.30 $\pm$ 0.14b  | 0.52 $\pm$ 0.67b      | 2.18 $\pm$ 1.35a  | n.d.              |
| 6     | 0.19 $\pm$ 0.16bc  | 0.24 $\pm$ 0.19b  | 0.58 $\pm$ 0.35a      | 0.11 $\pm$ 0.08bc | n.d.              |
| 7     | 0.30 $\pm$ 0.24ab  | 0.14 $\pm$ 0.05bc | 0.23 $\pm$ 0.05abc    | 0.40 $\pm$ 0.42a  | n.d.              |
| 8     | 0.39 $\pm$ 0.21ab  | 0.65 $\pm$ 0.50a  | 0.58 $\pm$ 0.39a      | 0.15 $\pm$ 0.13bc | 0.04 $\pm$ 0.02c  |
| 9     | 0.036 $\pm$ 0.03b  | 0.13 $\pm$ 0.09b  | 0.37 $\pm$ 0.38a      | 0.01 $\pm$ 0.01b  | 0.05 $\pm$ 0.02b  |
| 10    | 1.57 $\pm$ 0.80a   | 0.79 $\pm$ 0.32b  | 0.89 $\pm$ 0.30b      | 1.04 $\pm$ 0.51b  | 0.02 $\pm$ 0.02c  |
| 11    | 1.82 $\pm$ 0.50a   | 1.11 $\pm$ 0.44b  | 1.48 $\pm$ 0.40ab     | 1.49 $\pm$ 0.43ab | 0.06 $\pm$ 0.04c  |
| 12    | 0.54 $\pm$ 0.15a   | 0.25 $\pm$ 0.08b  | 0.44 $\pm$ 0.10a      | 0.24 $\pm$ 0.15b  | 0.04 $\pm$ 0.01c  |
| 13    | 0.05 $\pm$ 0.03c   | 0.20 $\pm$ 0.09a  | 0.08 $\pm$ 0.04bc     | 0.09 $\pm$ 0.04bc | 0.13 $\pm$ 0.05b  |
| 14    | 1.54 $\pm$ 0.28ab  | 1.00 $\pm$ 0.52c  | 1.27 $\pm$ 0.39bc     | 1.76 $\pm$ 0.48a  | 0.06 $\pm$ 0.04d  |
| 15    | 0.24 $\pm$ 0.35a   | 0.18 $\pm$ 0.11ab | 0.23 $\pm$ 0.17a      | 0.08 $\pm$ 0.05ab | 0.02 $\pm$ 0.01b  |
| 16    | 0.06 $\pm$ 0.04b   | 0.03 $\pm$ 0.02b  | 0.04 $\pm$ 0.04b      | 0.11 $\pm$ 0.10a  | 0.01 $\pm$ 0.01b  |
| 17    | 1.05 $\pm$ 0.18a   | 0.79 $\pm$ 0.35a  | 0.92 $\pm$ 0.25a      | 0.88 $\pm$ 0.21a  | 0.09 $\pm$ 0.04b  |
| 18    | 1.93 $\pm$ 0.57a   | 1.43 $\pm$ 0.38ab | 1.25 $\pm$ 0.19b      | 1.46 $\pm$ 0.54ab | 1.38 $\pm$ 0.85ab |
| 19    | 4.29 $\pm$ 1.50a   | 3.68 $\pm$ 1.46a  | 4.06 $\pm$ 1.35a      | 3.96 $\pm$ 1.40a  | 0.76 $\pm$ 0.49b  |
| 20    | 0.96 $\pm$ 0.44ab  | 1.10 $\pm$ 0.56a  | 1.19 $\pm$ 0.61a      | 0.51 $\pm$ 0.31bc | 0.37 $\pm$ 0.25c  |
| 21    | 1.08 $\pm$ 0.54a   | 0.64 $\pm$ 0.34ab | 0.76 $\pm$ 0.56ab     | 1.16 $\pm$ 0.68a  | 0.39 $\pm$ 0.33b  |
| 22    | 0.71 $\pm$ 0.52ab  | 1.01 $\pm$ 0.73ab | 1.20 $\pm$ 0.98a      | 0.61 $\pm$ 0.42ab | 0.35 $\pm$ 0.34b  |
| 23    | 0.18 $\pm$ 0.12b   | 0.59 $\pm$ 0.48a  | 0.37 $\pm$ 0.25ab     | 0.25 $\pm$ 0.23b  | 0.07 $\pm$ 0.05b  |
| 24    | 0.47 $\pm$ 0.19a   | 0.54 $\pm$ 0.18a  | 0.37 $\pm$ 0.23a      | 0.39 $\pm$ 0.19a  | 0.17 $\pm$ 0.08b  |
| 25    | 1.62 $\pm$ 0.60a   | 1.33 $\pm$ 0.60a  | 1.30 $\pm$ 0.56a      | 1.47 $\pm$ 0.85a  | 0.48 $\pm$ 0.45b  |

|                                   | 26                                           | 0.17±0.06b | 0.45±0.38a | 0.38±0.20ab | 0.25±0.17ab | 0.26±0.19ab |
|-----------------------------------|----------------------------------------------|------------|------------|-------------|-------------|-------------|
| Band position (cm <sup>-1</sup> ) | Assignment                                   |            |            |             |             |             |
| 1685–1645                         | Amide-I (β-sheet, random coil and α-helix)   |            |            |             |             |             |
| 1341                              | C–H bending                                  |            |            |             |             |             |
| 1309-1229                         | Amide-III (α-helix, random coil and β-sheet) |            |            |             |             |             |
| 1003                              | Phenylalanine                                |            |            |             |             |             |
| 940                               | C–C stretching                               |            |            |             |             |             |
| 850                               | Tyrosine                                     |            |            |             |             |             |
| 830                               | Tyrosine                                     |            |            |             |             |             |
| 760                               | Tryptophan                                   |            |            |             |             |             |

a,b,c, Different letters on same row indicate significant difference (P<0.05)

Table S3 Assignment of the most common bands of Raman spectrum in meat

Table S4 Common peptides identified in digestion products of DTT untreated pork products

| Sequence                   | MW(Da) | Accession | Description                                                        |
|----------------------------|--------|-----------|--------------------------------------------------------------------|
| ALVFQPVTELK                | 1244.7 | Q1HL06    | 6-phosphofructokinase (Fragment)                                   |
| SFEQISANITK                | 1237.6 | Q1HL06    | 6-phosphofructokinase (Fragment)                                   |
| VGIYTGAR                   | 836.5  | Q1HL06    | 6-phosphofructokinase (Fragment)                                   |
| AVDSLVPIGR                 | 1026.6 | F1RPS8    | ATP synthase subunit alpha heart isoform, mitochondrial (Fragment) |
| TGTAEVSSILEER              | 1391.7 | F1RPS8    | ATP synthase subunit alpha heart isoform, mitochondrial (Fragment) |
| TLGPALLEK                  | 941.6  | B1A3A0    | Beta-enolase 3 transcript variant 1                                |
| AAVPSGASTGIYEALELR         | 1804.9 | B1A3A0    | Beta-enolase 3 transcript variant 1                                |
| VVIGMDVAASEFYR             | 1556.8 | B1A3A0    | Beta-enolase 3 transcript variant 1                                |
| NYPVVSIEDPFDQDDWK          | 2066.9 | B1A3A0    | Beta-enolase 3 transcript variant 1                                |
| GNPTVEVDLHTAK              | 1380.7 | B1A3A0    | Beta-enolase 3 transcript variant 1                                |
| LSVVDQEK                   | 917.5  | B1A3A0    | Beta-enolase 3 transcript variant 1                                |
| FMIELDG TENK               | 1296.6 | B1A3A0    | Beta-enolase 3 transcript variant 1                                |
| DATNVGDEGGFAPNILENNEALELLK | 2743.3 | B1A3A0    | Beta-enolase 3 transcript variant 1                                |
| TAIQAAGYPDK                | 1134.6 | B1A3A0    | Beta-enolase 3 transcript variant 1                                |
| GVGFGMVDSEK                | 1125.5 | F1RJW7    | Calsequestrin                                                      |
| ELQAFENIEDEIK              | 1577.8 | F1RJW7    | Calsequestrin                                                      |
| GGPLTAAAYR                 | 905.5  | B6A7R3    | Carbonic anhydrase IIIb                                            |
| YNSFATALK                  | 1014.5 | B6A7R3    | Carbonic anhydrase IIIb                                            |
| HDPSLLPWTASYDPGSAK         | 1941.9 | B6A7R3    | Carbonic anhydrase IIIb                                            |
| IIAPPER                    | 795.5  | B6VNT8    | Cardiac muscle alpha actin 1                                       |
| VAPEEHPTLLTEAPLNPK         | 1956.0 | B6VNT8    | Cardiac muscle alpha actin 1                                       |
| QEYDEAGPSIVHR              | 1500.7 | B6VNT8    | Cardiac muscle alpha actin 1                                       |
| DLTDYLMK                   | 1014.5 | B6VNT8    | Cardiac muscle alpha actin 1                                       |
| GYSFVTTAER                 | 1130.6 | B6VNT8    | Cardiac muscle alpha actin 1                                       |

|                         |        |        |                                                         |
|-------------------------|--------|--------|---------------------------------------------------------|
| HQGVMVGMGQK             | 1187.6 | B6VNT8 | Cardiac muscle alpha actin 1                            |
| EITALAPSTMK             | 1177.6 | B6VNT8 | Cardiac muscle alpha actin 1                            |
| SYELPDGQVITIGNER        | 1790.9 | B6VNT8 | Cardiac muscle alpha actin 1                            |
| DSYVGDEAQS              | 1198.5 | B6VNT8 | Cardiac muscle alpha actin 1                            |
| AGFAGDDAPR              | 976.4  | B6VNT8 | Cardiac muscle alpha actin 1                            |
| AEEEYPDLSK              | 1180.5 | I3LBJ8 | Creatine kinase chain M2 (Fragment)                     |
| LMVEMEK                 | 879.4  | I3LBJ8 | Creatine kinase M-type                                  |
| GGDDLDPNYVLSSR          | 1507.7 | I3LBJ8 | Creatine kinase M-type                                  |
| LGSSEVEQVQLVVDGVK       | 1786.0 | I3LBJ8 | Creatine kinase M-type                                  |
| LSVEALNSLTGEFK          | 1507.8 | I3LBJ8 | Creatine kinase M-type                                  |
| GTGGVDTAAVGSVFDVSNADR   | 1994.9 | I3LBJ8 | Creatine kinase M-type                                  |
| GQSIDDMIPAQK            | 1318.6 | I3LBJ8 | Creatine kinase M-type                                  |
| FEEILTR                 | 907.5  | I3LBJ8 | Creatine kinase M-type                                  |
| DLFDPIIQDR              | 1231.6 | I3LBJ8 | Creatine kinase M-type                                  |
| HFSPEELK                | 986.5  | B1Q039 | CRYAB                                                   |
| LISEVIGER               | 1015.6 | O02855 | Cytosolic glycerol-3-phosphate dehydrogenase (Fragment) |
| ADAIGLSLIK              | 1000.6 | O02855 | Cytosolic glycerol-3-phosphate dehydrogenase (Fragment) |
| SYLSEEMIAEFK            | 1462.7 | A1XQV5 | Fast skeletal muscle troponin C                         |
| AAFDMFDADGGGDISVK       | 1731.8 | A1XQV5 | Fast skeletal muscle troponin C                         |
| GVVPLAGTDGETTTQGLDGLSER | 2273.1 | F1RJ25 | Fructose-bisphosphate aldolase                          |
| TFTTQETITNAETAK         | 1655.8 | F1RNU9 | Glucose-6-phosphate isomerase                           |
| VGVNGFGR                | 805.4  | G3CKJ2 | Glyceraldehyde-3-phosphate dehydrogenase (Fragment)     |
| AITIFQER                | 977.5  | Q0Q4G7 | Glyceraldehyde-3-phosphate dehydrogenase (Fragment)     |
| WGDAGATYVVESTGVFTTMEK   | 2249.1 | Q0Q4G7 | Glyceraldehyde-3-phosphate dehydrogenase (Fragment)     |
| LTGMAFR                 | 795.4  | A0SNU7 | Glyceraldehyde-3-phosphate dehydrogenase (Fragment)     |
| LISWYDNEFGYSNR          | 1763.8 | A0SNU7 | Glyceraldehyde-3-phosphate dehydrogenase (Fragment)     |

|                             |        |        |                                                     |
|-----------------------------|--------|--------|-----------------------------------------------------|
| VVDLMVHMASK                 | 1245.6 | A0SNU7 | Glyceraldehyde-3-phosphate dehydrogenase (Fragment) |
| GAAQNIIPASTGAAK             | 1369.7 | A0SNU7 | Glyceraldehyde-3-phosphate dehydrogenase (Fragment) |
| VNVDEVGGEALGR               | 1314.7 | F1RII7 | Hemoglobin subunit beta                             |
| VLQSFSDGLK                  | 1093.6 | F1RII7 | Hemoglobin subunit beta                             |
| LLLPGELAK                   | 953.6  | Q29574 | Histone H2B (Fragment)                              |
| GADPEDVITGAFK               | 1319.6 | A1XQT5 | HUMMLC2B                                            |
| NEELDAMMK                   | 1080.5 | A1XQT5 | HUMMLC2B                                            |
| FSQEEIK                     | 880.4  | A1XQT5 | HUMMLC2B                                            |
| AAAEGSSNVFSMFDQTQIQEFK      | 2451.1 | A1XQT5 | HUMMLC2B                                            |
| EAFTVIDQNR                  | 1192.6 | A1XQT5 | HUMMLC2B                                            |
| DTFAAMGR                    | 884.4  | A1XQT5 | HUMMLC2B                                            |
| NMWAAFPPDVGGNVNDYK          | 1880.9 | A1XQT5 | HUMMLC2B                                            |
| LVESGGGLVQPGGSLR            | 1525.8 | L8B165 | IgG heavy chain                                     |
| SADTLWGIQK                  | 1118.6 | D2SW96 | L-lactate dehydrogenase                             |
| QVVDSAYEVIK                 | 1250.7 | D2SW96 | L-lactate dehydrogenase                             |
| VTLTPEEEAHLK                | 1366.7 | D2SW96 | L-lactate dehydrogenase                             |
| ELADEIALVDVMEDK             | 1689.8 | D2SW96 | L-lactate dehydrogenase                             |
| IVEGLPINDFSR                | 1359.7 | I3LBY9 | Malate dehydrogenase                                |
| ITLSQVGDVLR                 | 1200.7 | A1XQT6 | MLC1f                                               |
| KPAAAAAPAPAPAPAPAPAPAPPK    | 2098.2 | A1XQT6 | MLC1f                                               |
| KPAAAAAPAPAPAPAPAPAPAPPKEEK | 2484.4 | A1XQT6 | MLC1f                                               |
| VLGNPSNEEMNAK               | 1402.7 | A1XQT6 | MLC1f                                               |
| HVLATLGEK                   | 967.6  | A1XQT6 | MLC1f                                               |
| ALGTNPTNAEVK                | 1214.6 | A1XQT6 | MLC1f                                               |
| DQGSYEDFVEGLR               | 1514.7 | A1XQT6 | MLC1f                                               |
| ALGQNPTQAEVLR               | 1396.8 | F1SNW4 | MYL3                                                |

|                     |        |         |                                                 |
|---------------------|--------|---------|-------------------------------------------------|
| ELTYQTEEDR          | 1283.6 | Q95249  | Myosin heavy chain (Fragment)                   |
| LQDLVDK             | 830.5  | Q95249; | Myosin heavy chain (Fragment)                   |
| AITDAAMMAEELKK      | 1537.8 | F1SS64  | Myosin heavy chain (Fragment)                   |
| ELENEVENEQK         | 1360.6 | Q95249  | Myosin heavy chain (Fragment)                   |
| AITDAAMMAEELK       | 1409.7 | F1SS64  | Myosin heavy chain (Fragment)                   |
| QAEEAEEQSNVNLSK     | 1675.8 | Q95249  | Myosin heavy chain (Fragment)                   |
| ELTYQTEEDRK         | 1411.7 | Q95249  | Myosin heavy chain (Fragment)                   |
| EQD TSAHLER         | 1185.6 | Q95249  | Myosin heavy chain (Fragment)                   |
| IEAQNKPFDAK         | 1260.7 | O46422  | Myosin heavy chain isoform fast type (Fragment) |
| NAYEESLDQLETLK      | 1652.8 | F1SS64  | Myosin-1 (Fragment)                             |
| VAEQELLDASER        | 1359.7 | F1SS64  | Myosin-1 (Fragment)                             |
| SALAHAVQSSR         | 1126.6 | F1SS62  | Myosin-1 (Fragment)                             |
| MEIDDLASNMETVSK     | 1698.8 | F1SS64  | Myosin-1 (Fragment)                             |
| TLEDQLSELK          | 1175.6 | F1SS64  | Myosin-1 (Fragment)                             |
| QAFTQQIEELK         | 1334.7 | F1SS61  | Myosin-1 (Fragment)                             |
| IEDEQALAMQLQK       | 1516.8 | F1SS62  | Myosin-1 (Fragment)                             |
| EMANMKEEFEK         | 1385.6 | F1SS62  | Myosin-1 (Fragment)                             |
| NAYEESLDQLETLKR     | 1808.9 | F1SS64  | Myosin-1 (Fragment)                             |
| EQLAMVER            | 991.5  | F1SS64  | Myosin-1 (Fragment)                             |
| HADSV AELGEQIDNLQR  | 1894.9 | F1SS64  | Myosin-1 (Fragment)                             |
| VQLLHTQNTSLINTK     | 1710.0 | F1SS64  | Myosin-1 (Fragment)                             |
| VVESMQSMLDAEIR      | 1607.8 | F1SS64  | Myosin-1 (Fragment)                             |
| LAQESTMDIENDKQQLDEK | 2235.0 | F1SS62  | Myosin-1 (Fragment)                             |
| LEQQVDDLEGSLEQEK    | 1859.9 | F1SS64  | Myosin-1 (Fragment)                             |
| MVALMQEK            | 949.5  | F1SS62  | Myosin-1 (Fragment)                             |
| EFEMSNLQSK          | 1212.6 | F1SS62  | Myosin-1 (Fragment)                             |



|                   |        |        |                     |
|-------------------|--------|--------|---------------------|
| DIDDLELTLAK       | 1245.7 | F1SS64 | Myosin-1 (Fragment) |
| IQLELNQVK         | 1084.6 | F1SS64 | Myosin-1 (Fragment) |
| DPLNETVVGLYQK     | 1475.8 | F1SS61 | Myosin-1 (Fragment) |
| ANSEVAQWR         | 1060.5 | F1SS61 | Myosin-1 (Fragment) |
| EQYEEEQEAK        | 1282.5 | F1SS61 | Myosin-1 (Fragment) |
| ANLLQAEIEELR      | 1398.8 | F1SS64 | Myosin-1 (Fragment) |
| VLNASAIPEGQFIDSK  | 1688.9 | F1SS61 | Myosin-1 (Fragment) |
| NKDPLNETVVGLYQK   | 1717.9 | F1SS61 | Myosin-1 (Fragment) |
| QAFTQQIEELKR      | 1490.8 | F1SS61 | Myosin-1 (Fragment) |
| DLEEATLQHEATAATLR | 1868.9 | F1SS62 | Myosin-1 (Fragment) |
| LINDLTAQR         | 1043.6 | F1SS64 | Myosin-1 (Fragment) |
| NLTEEMAGLDETIK    | 1634.8 | F1SS64 | Myosin-1 (Fragment) |
| LEQQVDDLEGSLEQEKK | 1988.0 | F1SS64 | Myosin-1 (Fragment) |
| AEDEEEINAELTAK    | 1561.7 | F1SS64 | Myosin-1 (Fragment) |
| MAAEALR           | 761.4  | F1SS64 | Myosin-1 (Fragment) |
| LAQLITR           | 814.5  | F1SS64 | Myosin-1 (Fragment) |
| TKYETDAIQR        | 1224.6 | F1SS64 | Myosin-1 (Fragment) |
| KVAEQELLDASER     | 1487.8 | F1SS64 | Myosin-1 (Fragment) |
| LEEAGGATSAQIEMNK  | 1664.8 | F1SS64 | Myosin-1 (Fragment) |
| LYEQHLGK          | 987.5  | F1SS64 | Myosin-1 (Fragment) |
| LQDAEEHVAVNAK     | 1552.8 | F1SS62 | Myosin-1 (Fragment) |
| EDQVFPMPNPPK      | 1301.6 | O46422 | Myosin-1            |
| ENQSILITGESGAGK   | 1503.8 | F1SS64 | Myosin-1            |
| LASADIETYLLEK     | 1465.8 | F1SS64 | Myosin-1            |
| TEAGATLTVK        | 990.5  | O46422 | Myosin-1            |
| DLEEATLQHEATAAALR | 1838.9 | F1SS64 | Myosin-1            |

|                         |        |        |                                    |
|-------------------------|--------|--------|------------------------------------|
| TSVFVAEPK               | 977.5  | O46422 | Myosin-1                           |
| VGNEYVTK                | 909.5  | F1SS64 | Myosin-1                           |
| LTGAVMHYGNLK            | 1319.7 | F1SS64 | Myosin-1                           |
| VIQYFATIAVTGEK          | 1539.8 | F1SS64 | Myosin-1                           |
| EALVSQLSR               | 1002.6 | F1SS64 | Myosin-1                           |
| LQTESGEFSR              | 1153.6 | F1SS64 | Myosin-1                           |
| MQGTLEDQIISANPLLEAFGNAK | 2476.2 | F1SS64 | Myosin-1                           |
| AQLEFNQIK               | 1090.6 | F1S9D6 | Myosin-7                           |
| DVYVPDDKEEFVK           | 1582.8 | F1S9D6 | Myosin-7                           |
| MVSLLEK                 | 947.5  | F1S9D6 | Myosin-7                           |
| LYTQQLDLK               | 1351.7 | F1S9D6 | Myosin-7                           |
| ILNPAAIPEGQFIDSR        | 1740.9 | F1S9D6 | Myosin-7                           |
| LELDDVTSNMEQIIK         | 1747.9 | F1S9D6 | Myosin-7                           |
| IEDEQALGSQQLK           | 1458.7 | F1S9D6 | Myosin-7                           |
| DTQIQLDDAVR             | 1273.6 | F1S9D6 | Myosin-7                           |
| VVDSLQTSLEAETR          | 1533.8 | F1S9D6 | Myosin-7                           |
| LEEAGGATSVQIEMNK        | 1676.8 | F1S9D6 | Myosin-7                           |
| DFELNALNAR              | 1162.6 | F1S9D6 | Myosin-7                           |
| SAYLMGLNSADLLK          | 1495.8 | F1S9D6 | Myosin-7                           |
| LAEQELIETSER            | 1417.7 | F1S9D6 | Myosin-7                           |
| LLSNLFANYAGADTPVEK      | 1923.0 | F1S9D6 | Myosin-7                           |
| LEDEEEMNAELTAK          | 1621.7 | F1S9D6 | Myosin-7                           |
| EDQVLQQNPPK             | 1295.7 | F1S9D6 | Myosin-7                           |
| GTLEDQIIQANPALEAFGNAK   | 2200.1 | F1S9D6 | Myosin-7                           |
| FHVEEEGK                | 974.5  | K7GKJ8 | Phosphoglycerate kinase (Fragment) |
| VLNNMEIGTSLFDEEGSK      | 1982.9 | K7GKJ8 | Phosphoglycerate kinase (Fragment) |

|                           |        |        |                                    |
|---------------------------|--------|--------|------------------------------------|
| ITLPVDFVTADK              | 1318.7 | K7GKJ8 | Phosphoglycerate kinase (Fragment) |
| VDFNVPMK                  | 965.5  | D0G784 | Phosphoglycerate kinase (Fragment) |
| VLPGVDAALSNV              | 1083.6 | K7GKJ8 | Phosphoglycerate kinase (Fragment) |
| SFDIPPPMDEK               | 1372.6 | B5KJG2 | Phosphoglycerate mutase 2          |
| ALPFWNDEIAPQIK            | 1641.9 | B5KJG2 | Phosphoglycerate mutase 2          |
| FLGDEETVR                 | 1065.5 | B5KJG2 | Phosphoglycerate mutase 2          |
| YEFGIFNQK                 | 1145.6 | F1RQQ8 | Phosphorylase                      |
| MSLVEEGAVK                | 1062.6 | F1RQQ8 | Phosphorylase                      |
| NLAENISR                  | 916.5  | F1RQQ8 | Phosphorylase                      |
| GLAGVENVAELKK             | 1327.8 | F1RQQ8 | Phosphorylase                      |
| FSAYLER                   | 885.4  | F1RQQ8 | Phosphorylase                      |
| IGEEYIADLDQLR             | 1534.8 | F1RQQ8 | Phosphorylase                      |
| VFADYEDYIK                | 1262.6 | F1RQQ8 | Phosphorylase                      |
| VLYPNDNFFEGK              | 1442.7 | F1RQQ8 | Phosphorylase                      |
| LLSYVDDEAFIR              | 1440.7 | F1RQQ8 | Phosphorylase                      |
| GLAGVENVAELK              | 1199.7 | F1RQQ8 | Phosphorylase                      |
| VIFLENYR                  | 1053.6 | F1RQQ8 | Phosphorylase                      |
| GYNAQEYYDR                | 1278.5 | F1RQQ8 | Phosphorylase                      |
| VIPAADLSEQISTAGTEASGTGNMK | 2448.2 | F1RQQ8 | Phosphorylase                      |
| ITLDNAYMEK                | 1197.6 | F1SHL9 | Pyruvate kinase (Fragment)         |
| GDLGIEIPA EK              | 1141.6 | F1SHL9 | Pyruvate kinase (Fragment)         |
| GSGTAEVELK                | 990.5  | F1SHL9 | Pyruvate kinase (Fragment)         |
| LDIDSPPITAR               | 1197.6 | F1SHL9 | Pyruvate kinase (Fragment)         |
| GVNLPGAAVDLPAVSEK         | 1636.9 | F1SHL9 | Pyruvate kinase (Fragment)         |
| VNLAMNVGK                 | 945.5  | F1SHL9 | Pyruvate kinase (Fragment)         |
| DPVQEAWAEDVDLR            | 1642.8 | F1SHL9 | Pyruvate kinase (Fragment)         |

|                           |        |         |                                      |
|---------------------------|--------|---------|--------------------------------------|
| APIIAVTR                  | 840.5  | F1SHL9  | Pyruvate kinase (Fragment)           |
| GDYPLEAVR                 | 1019.5 | F1SHL9  | Pyruvate kinase (Fragment)           |
| VIKPPPVEPPPAPIAAPVTVPVVGK | 2469.5 | O97771  | Titin (Fragment)                     |
| THVSEAVAQSTR              | 1285.7 | Q1PC32  | Triosephosphate isomerase (Fragment) |
| EQAEAEVASLNR              | 1316.6 | Q2XQY5  | Tropomyosin 3                        |
| IQLVEEELDR                | 1243.7 | F1SG00  | Tropomyosin alpha-1 chain            |
| KATDAEADVASLNR            | 1460.7 | F2Z5B6  | Tropomyosin alpha-1 chain            |
| SIDDLEDELYAQK             | 1538.7 | F2Z5B6  | Tropomyosin alpha-1 chain            |
| QLEDELVSLQK               | 1301.7 | F2Z5B6  | Tropomyosin alpha-1 chain            |
| SLEAQA EK                 | 875.4  | F2Z5B6  | Tropomyosin alpha-1 chain            |
| ATEDELDKYSEALK            | 1611.8 | F2Z5B6  | Tropomyosin alpha-1 chain            |
| ATDAEADVASLNR             | 1332.6 | F2Z5B6  | Tropomyosin alpha-1 chain            |
| MEIQEIQLK                 | 1147.6 | F2Z5B6  | Tropomyosin alpha-1 chain            |
| IDAAEEEKYDMEIK            | 1683.8 | B3VI70  | Troponin I                           |
| MSADAMLK                  | 866.4  | B3VI70  | Troponin I                           |
| SVMLQIAATELEK             | 1432.8 | B3VI70  | Troponin I                           |
| YDIINLR                   | 906.5  | Q75NG6  | Troponin T fast skeletal muscle type |
| ALSSMGANYSSYLAK           | 1578.8 | Q75NH0  | Troponin T fast skeletal muscle type |
| IPEGEKVD FDDIQK           | 1632.8 | Q75NH0  | Troponin T fast skeletal muscle type |
| VATVSLPR                  | 842.5  | C5I WV5 | Trypsinogen                          |
| ALGQNPTNAEVL R            | 1382.7 | F1SLZ3  | Uncharacterized protein (Fragment)   |
| GADPEETILNAFK             | 1404.7 | F6PSL2  | Uncharacterized protein (Fragment)   |
| ILTPLTDQTVNLGK            | 1512.9 | F1SRI8  | Uncharacterized protein (Fragment)   |
| STGIVEMVM DR              | 1237.6 | F1RVL5  | Uncharacterized protein (Fragment)   |
| GQDVSILEIAGK              | 1229.7 | F1RVL5  | Uncharacterized protein (Fragment)   |
| LMALSNEIK                 | 1018.6 | F1RVL5  | Uncharacterized protein (Fragment)   |

|                     |        |        |                                    |
|---------------------|--------|--------|------------------------------------|
| NQSSLVLIGDAFK       | 1391.8 | F1RVL5 | Uncharacterized protein (Fragment) |
| YAVFDLAEGK          | 1112.6 | F1RVL5 | Uncharacterized protein (Fragment) |
| SDFTNWMK            | 1028.5 | F1SHW9 | Uncharacterized protein (Fragment) |
| MVGFQSLQDDPK        | 1364.6 | F1SHW9 | Uncharacterized protein (Fragment) |
| TIYTAPLDMLQVTQAK    | 1793.0 | F1SHW9 | Uncharacterized protein (Fragment) |
| YTMGPDLPQFLQAK      | 1608.8 | F1SHW9 | Uncharacterized protein (Fragment) |
| TIEGIVMAADSAR       | 1333.7 | F1RK48 | Uncharacterized protein (Fragment) |
| VTFVDTPGHIENR       | 1460.8 | F1RK48 | Uncharacterized protein (Fragment) |
| ADNLATQMLMR         | 1263.6 | F1RK48 | Uncharacterized protein (Fragment) |
| DFNVPLSISR          | 1147.6 | I3LLS0 | Uncharacterized protein (Fragment) |
| AYDLQSDAIYK         | 1286.6 | F1SHX0 | Uncharacterized protein (Fragment) |
| ILDQYLYK            | 1055.6 | F1SHX0 | Uncharacterized protein (Fragment) |
| LVSIGAEIIVDGNVK     | 1542.8 | F1RHL9 | Uncharacterized protein            |
| MVSDIAGAWQR         | 1233.6 | F1RHL9 | Uncharacterized protein            |
| GITQEQMNEFR         | 1352.6 | F1RHL9 | Uncharacterized protein            |
| NFAEPGSDVYLR        | 1367.7 | F1S557 | Uncharacterized protein            |
| VGEATETALTTLVEK     | 1561.8 | F1RFH9 | Uncharacterized protein            |
| VDQSILTGESVSVIK     | 1574.9 | F1RFH9 | Uncharacterized protein            |
| MNVFNTDVR           | 1095.5 | F1RFH9 | Uncharacterized protein            |
| IGIFGENEDVADR       | 1434.7 | F1RFH9 | Uncharacterized protein            |
| AFGPGLEGGLVNK       | 1258.7 | F1SMN5 | Uncharacterized protein            |
| SPFVVNVAPPLDSLK     | 1582.9 | F1SMN5 | Uncharacterized protein            |
| ITESDLSQLTASIR      | 1533.8 | F1SMN5 | Uncharacterized protein            |
| ADLNNLGTIAK         | 1242.7 | F1RQU2 | Uncharacterized protein            |
| GAPAYTPPLQGPQVSPLAR | 1920.0 | F1SEN8 | Uncharacterized protein            |
| DLTVDSASPVYQAVIK    | 1705.9 | F1SEN8 | Uncharacterized protein            |

|                   |        |        |                         |
|-------------------|--------|--------|-------------------------|
| DFNMPLTISR        | 1193.6 | F1SEN8 | Uncharacterized protein |
| SASYNLSLTLQK      | 1324.7 | F1SEN8 | Uncharacterized protein |
| LAAGMAGSLEEQMAGLR | 1704.8 | F1RU49 | Uncharacterized protein |
| ETAETDTAEQVVASFK  | 1725.8 | F1RU49 | Uncharacterized protein |
| GAILGIQGEIQK      | 1226.7 | F1RU49 | Uncharacterized protein |
| DQMLQEELTR        | 1278.6 | F1RU49 | Uncharacterized protein |
| AGTQIENIEEDFR     | 1521.7 | F1RU49 | Uncharacterized protein |
| NYITAEELR         | 1108.6 | F1RU49 | Uncharacterized protein |
| DLLLDPAWEK        | 1199.6 | F1RU49 | Uncharacterized protein |
| TINEVENQVLTR      | 1415.8 | F1RU49 | Uncharacterized protein |
| GLSQEQLNEFR       | 1320.7 | F1RU49 | Uncharacterized protein |
| DYESASLQEVK       | 1296.6 | F1RU49 | Uncharacterized protein |
| MFLGFPTTK         | 1041.5 | F1RGX4 | Uncharacterized protein |
| ADISSFVIESAER     | 1423.7 | F1RH20 | Uncharacterized protein |
| YVFENVGK          | 955.5  | F1RH20 | Uncharacterized protein |
| VVGVNIAGR         | 884.5  | F1RH20 | Uncharacterized protein |
| VTNPAGEDVASIFLR   | 1588.8 | F1RH20 | Uncharacterized protein |
| IAFYGITDLR        | 1296.7 | F1RH20 | Uncharacterized protein |
| SQPATLAQPVTIR     | 1381.8 | F1RH20 | Uncharacterized protein |
| FPVTGLIEGR        | 1088.6 | F1SM75 | Uncharacterized protein |
| TPVTGYFVDMK       | 1257.6 | F1SM75 | Uncharacterized protein |
| VDLGVLGK          | 800.5  | F1S814 | Uncharacterized protein |
| IDAMHGVPYVK       | 1385.7 | F1S814 | Uncharacterized protein |
| FNISNGGPAEAITDK   | 1630.8 | F1S814 | Uncharacterized protein |
| IALYETPTGWK       | 1278.7 | F1S814 | Uncharacterized protein |
| LSGTGSAGATIR      | 1090.6 | F1S814 | Uncharacterized protein |

|                     |        |        |                         |
|---------------------|--------|--------|-------------------------|
| YDYEEVEAEGANK       | 1516.6 | F1S814 | Uncharacterized protein |
| IDNFEYSDPVDGSISR    | 1813.8 | F1S814 | Uncharacterized protein |
| FFGNLMDASK          | 1129.5 | F1S814 | Uncharacterized protein |
| IGGIGTVPVGR         | 1025.6 | F1STM4 | Uncharacterized protein |
| QLEEEQALQK          | 1343.7 | F1SG00 | Uncharacterized protein |
| MEIQEMQLK           | 1149.6 | F1SG00 | Uncharacterized protein |
| NQVAMNPTNTVFDAK     | 1649.8 | F1S9Q3 | Uncharacterized protein |
| ATGNPNPDIVWLK       | 1424.8 | I3L8Q0 | Uncharacterized protein |
| VPAPVEIPVTPPTLVSGLK | 1914.1 | I3L8Q0 | Uncharacterized protein |

---

Table S5 Common peptides identified in digestion products of DTT treated pork products

| Sequence              | MW(Da) | Acession | Description                                                        |
|-----------------------|--------|----------|--------------------------------------------------------------------|
| ALVFQPVTELK           | 1244.7 | Q1HL06   | 6-phosphofructokinase (Fragment)                                   |
| GQIEEAGWSYVGGWTGQGGSK | 2154.0 | Q1HL06   | 6-phosphofructokinase (Fragment)                                   |
| VLVVHDFEGLAK          | 1383.8 | Q1HL06   | 6-phosphofructokinase (Fragment)                                   |
| GITNLCVIGDGS�TGADTFR  | 2124.0 | Q1HL06   | 6-phosphofructokinase (Fragment)                                   |
| IFANTPDSGCVLGMР       | 1653.8 | Q1HL06   | 6-phosphofructokinase (Fragment)                                   |
| DLQVNVEHLVQK          | 1421.8 | Q1HL06   | 6-phosphofructokinase (Fragment)                                   |
| LPLMECVQVTK           | 1317.7 | Q1HL06   | 6-phosphofructokinase (Fragment)                                   |
| SEWGDLLNDLQK          | 1417.7 | Q1HL06   | 6-phosphofructokinase (Fragment)                                   |
| DINQEVYNFLATAGAK      | 1753.9 | F1SRC5   | Aconitate hydratase, mitochondrial (Fragment)                      |
| LSGGIDFNQPLIITR       | 1643.9 | D3GGC5   | Actinin-associated LIM protein 1a                                  |
| VLQELVNDGPDDRPAГTR    | 1952.0 | D3GGC5   | Actinin-associated LIM protein 1a                                  |
| EPLMEEYAIAAQVFK       | 1738.9 | A6NA29   | Adenosine monophosphate deaminase 1                                |
| VCDLLSDFDEFSAR        | 1673.8 | I3L878   | Adenylosuccinate synthetase (Fragment)                             |
| TCGFDFTGALDISK        | 1660.8 | F1RFU5   | Aspartate aminotransferase (Fragment)                              |
| IASTILTSPDLR          | 1286.7 | F1RFU5   | Aspartate aminotransferase (Fragment)                              |
| TGTAEVSSILEER         | 1391.7 | F1RPS8   | ATP synthase subunit alpha heart isoform, mitochondrial (Fragment) |
| FTQAGSEVSALLGR        | 1435.8 | Q0QEM6   | ATP synthase subunit beta (Fragment)                               |
| IMDPNIVGSEHYDVAR      | 1831.9 | Q0QEM6   | ATP synthase subunit beta (Fragment)                               |
| AIAELGIYPAVDPLDSTSR   | 1988.0 | Q0QEM6   | ATP synthase subunit beta (Fragment)                               |
| AAVPSGASTGIYEALCLR    | 1804.9 | B1A3A0   | Beta-enolase 3 transcript variant 1                                |
| VVIGMDVAASEFYR        | 1572.8 | B1A3A0   | Beta-enolase 3 transcript variant 1                                |
| NYPVVSIEDPFDQDDWK     | 2066.9 | B1A3A0   | Beta-enolase 3 transcript variant 1                                |
| GNPTVEVDLHTAK         | 1380.7 | B1A3A0   | Beta-enolase 3 transcript variant 1                                |
| VNQIGSVTESIQACK       | 1633.8 | B1A3A0   | Beta-enolase 3 transcript variant 1                                |



|                              |        |        |                                     |
|------------------------------|--------|--------|-------------------------------------|
| FMIELDGTENK                  | 1296.6 | B1A3A0 | Beta-enolase 3 transcript variant 1 |
| DATNVGDEGGFAPNILENNEALELLK   | 2743.3 | B1A3A0 | Beta-enolase 3 transcript variant 1 |
| TPVPPFGLLAGETLPR             | 1624.9 | Q1AG05 | Calsarcin 3                         |
| LGLTEEDSIYVFK                | 1513.8 | F1RJW7 | Calsequestrin                       |
| ELQAFENIEDEIK                | 1577.8 | F1RJW7 | Calsequestrin                       |
| HDPSLLPWTASYDPSAK            | 1941.9 | A7E1S9 | Carbonic anhydrase IIIb             |
| VAPEEHPTLLTEAPLNPK           | 1956.0 | B6VNT8 | Cardiac muscle alpha actin 1        |
| QEYDEAGPSIVHR                | 1500.7 | B6VNT8 | Cardiac muscle alpha actin 1        |
| DLTDYLMK                     | 1014.5 | B6VNT8 | Cardiac muscle alpha actin 1        |
| LCYVALDFENEMATAASSSSLEK      | 2552.2 | B6VNT8 | Cardiac muscle alpha actin 1        |
| SYELPDGQVITIGNER             | 1790.9 | B6VNT8 | Cardiac muscle alpha actin 1        |
| CPETLFQPSFIGMESAGIHETTYNSIMK | 3204.5 | B6VNT8 | Cardiac muscle alpha actin 1        |
| GGDDLDPNYVLSSR               | 1507.7 | I3LBJ8 | Creatine kinase M-type              |
| LGSSEVEQVQLVVDGVK            | 1786.0 | I3LBJ8 | Creatine kinase M-type              |
| LSVEALNSLTGEFK               | 1507.8 | I3LBJ8 | Creatine kinase M-type              |
| GTGGVDTAAVGSVFDVSNADR        | 1994.9 | I3LBJ8 | Creatine kinase M-type              |
| RGTGGVDTAAVGSVFDVSNADR       | 2151.0 | I3LBJ8 | Creatine kinase M-type              |
| FCVGLQK                      | 851.4  | I3LBJ8 | Creatine kinase M-type              |
| DLFDPIQDR                    | 1231.6 | I3LBJ8 | Creatine kinase M-type              |
| APSWIDTGLSEMR                | 1462.7 | B1Q039 | CRYAB                               |
| FPEVPELEPLGPMCPFR            | 2015.0 | F1SQ10 | Decorin                             |
| NMDGYIDAEELAEIFR             | 1901.9 | A1XQV5 | Fast skeletal muscle troponin C     |
| IDFDEFLK                     | 1026.5 | A1XQV5 | Fast skeletal muscle troponin C     |
| SYLSEEMIAEFK                 | 1462.7 | A1XQV5 | Fast skeletal muscle troponin C     |
| AAFDMFDADGGDISVK             | 1731.8 | A1XQV5 | Fast skeletal muscle troponin C     |
| ASGEHVTDEELESIMK             | 1774.8 | A1XQV5 | Fast skeletal muscle troponin C     |

|                             |        |        |                                                     |
|-----------------------------|--------|--------|-----------------------------------------------------|
| IGEHTPSSLAIMENANVLAR        | 2139.1 | Q6UV40 | Fructose-bisphosphate aldolase A (Fragment)         |
| YASICQQNGIVPIVEPEILPDGDHDLK | 3020.5 | Q6UV40 | Fructose-bisphosphate aldolase A (Fragment)         |
| GVVPLAGTDGETTTQGLDGLSER     | 2273.1 | F1RJ25 | Fructose-bisphosphate aldolase                      |
| TLATLNPESSLFIIASK           | 1805.0 | F1RNU9 | Glucose-6-phosphate isomerase                       |
| IVSNASCTTNCLAPLAK           | 1819.9 | F1RM74 | Glyceraldehyde-3-phosphate dehydrogenase (Fragment) |
| VPTPNVSVVDLTCR              | 1556.8 | A0SNU7 | Glyceraldehyde-3-phosphate dehydrogenase (Fragment) |
| WGDAGATYVVESTGVFTTMEK       | 2249.0 | Q9TUY2 | Glyceraldehyde-3-phosphate dehydrogenase (Fragment) |
| VIISAPSADAPMFVMGVNHEK       | 2229.1 | Q9TUY2 | Glyceraldehyde-3-phosphate dehydrogenase (Fragment) |
| LISWYDNEFGYSNR              | 1763.8 | A0SNU7 | Glyceraldehyde-3-phosphate dehydrogenase (Fragment) |
| LGIPMSVLMGANIANEVADEK       | 2172.1 | D2XN65 | Glycerol-3-phosphate dehydrogenase 1                |
| ADAIGLSLIK                  | 1000.6 | D2XN65 | Glycerol-3-phosphate dehydrogenase 1                |
| NIVAVGAGFCDGLGFGDNTK        | 2012.0 | D2XN65 | Glycerol-3-phosphate dehydrogenase 1                |
| LFDQAFGLPR                  | 1163.6 | Q5IZV0 | Heat shock protein 27kDa (Fragment)                 |
| VSLDVNHFAPEELTVK            | 1797.9 | Q5IZV0 | Heat shock protein 27kDa (Fragment)                 |
| FFESFGDLSNADAVMGNPK         | 2045.9 | F1RII7 | Hemoglobin subunit beta                             |
| LSELHCDQLHVDPENFR           | 2109.0 | F1RII7 | Hemoglobin subunit beta                             |
| LGHDFNPDVQAAFQK             | 1686.8 | F1RII7 | Hemoglobin subunit beta                             |
| GADPEDVITGAFK               | 1319.6 | A1XQT5 | HUMMLC2B                                            |
| HFLEELLTTQCDR               | 1661.8 | A1XQT5 | HUMMLC2B                                            |
| AAAEGSSNVFSMFDQTQIQEFK      | 2451.1 | A1XQT5 | HUMMLC2B                                            |
| NICYVITHGDAK                | 1390.7 | A1XQT5 | HUMMLC2B                                            |
| NMWAAFPDPVGGNVDYK           | 1896.9 | A1XQT5 | HUMMLC2B                                            |
| QVVDSAYEVIK                 | 1250.7 | D2SW96 | L-lactate dehydrogenase                             |
| GEMMDLQHGSFLR               | 1649.8 | D2SW96 | L-lactate dehydrogenase                             |
| ELADEIALVDVMEDK             | 1689.8 | D2SW96 | L-lactate dehydrogenase                             |
| EDVFLSVPCILGQNGISDVVK       | 2289.2 | D2SW96 | L-lactate dehydrogenase                             |

|                             |        |        |                                                        |
|-----------------------------|--------|--------|--------------------------------------------------------|
| VIVVGNPANTNCLTASK           | 1757.9 | I3LBY9 | Malate dehydrogenase                                   |
| GCDVVVIPAGVPR               | 1338.7 | I3LP41 | Malate dehydrogenase                                   |
| SQETDCPYFSTPLLLGK           | 1955.9 | I3LP41 | Malate dehydrogenase                                   |
| ITLSQVGDVLR                 | 1200.7 | A1XQT6 | MLC1f                                                  |
| EAFLLFDR                    | 1010.5 | A1XQT6 | MLC1f O                                                |
| KPAAAAAPAPAPAPAPAPAPAPPK    | 2098.2 | A1XQT6 | MLC1f                                                  |
| KPAAAAAPAPAPAPAPAPAPAPPKEEK | 2484.4 | A1XQT6 | MLC1f                                                  |
| DQGSYEDFVEGLR               | 1514.7 | A1XQT6 | MLC1f                                                  |
| DTGTYESDFVEGLR              | 1501.7 | F1SNW4 | MYL3                                                   |
| IEFTPEQIEEFK                | 1509.7 | F1SNW4 | MYL3                                                   |
| LETDISQIQGEMEDIVQEAR        | 2304.1 | Q95249 | Myosin heavy chain (Fragment)                          |
| LLGSLDIDHNQYK               | 1515.8 | H6SHX6 | Myosin, heavy chain 7, cardiac muscle, beta (Fragment) |
| ILNPAAIPEGQFIDSR            | 1740.9 | H6SHX6 | Myosin, heavy chain 7, cardiac muscle, beta (Fragment) |
| NAYEESLDQLETLK              | 1652.8 | F1SS64 | Myosin-1 (Fragment)                                    |
| MEGDLNEMEIQLNHANR           | 2029.9 | F1SS64 | Myosin-1 (Fragment)                                    |
| ALQEAHQQTLDLQAEEDKVNTLTK    | 2838.4 | F1SS64 | Myosin-1 (Fragment)                                    |
| MEIDDLASNMETVSK             | 1698.8 | F1SS66 | Myosin-1 (Fragment)                                    |
| AITDAAMMAEELKK              | 1521.8 | F1SS66 | Myosin-1 (Fragment)                                    |
| QAFTQQIEELK                 | 1334.7 | F1SS61 | Myosin-1 (Fragment)                                    |
| IEDEQALAMQLQK               | 1516.8 | F1SS62 | Myosin-1 (Fragment)                                    |
| NLQQEISDLTEQIAEGGK          | 1973.0 | F1SS64 | Myosin-1 (Fragment)                                    |
| AITDAAMMAEELK               | 1409.7 | F1SS66 | Myosin-1 (Fragment)                                    |
| SEIQAALAEAEASLEHEEGK        | 2170.0 | F1SS64 | Myosin-1 (Fragment)                                    |
| NAYEESLDQLETLKR             | 1808.9 | F1SS64 | Myosin-1 (Fragment)                                    |
| RDLEEATLQHEATAATLR          | 2025.0 | F1SS62 | Myosin-1 (Fragment)                                    |
| HADSVAEELGEQIDNLQR          | 1894.9 | F1SS66 | Myosin-1 (Fragment)                                    |

|                      |        |        |                     |
|----------------------|--------|--------|---------------------|
| TLAFLFTGAAGADAEAGGGK | 1824.9 | F1SS62 | Myosin-1 (Fragment) |
| YEETHAELEASQK        | 1534.7 | F1SS64 | Myosin-1 (Fragment) |
| VQLLHTQNTSLINTK      | 1710.0 | F1SS64 | Myosin-1 (Fragment) |
| LETDISIQGEMEDIQEAR   | 2318.1 | F1SS62 | Myosin-1 (Fragment) |
| VVESMQSMLDAEIR       | 1623.8 | F1SS64 | Myosin-1 (Fragment) |
| LAQESTMDIENDKQQLDEK  | 2235.1 | F1SS62 | Myosin-1 (Fragment) |
| TKLEQQVDDLEGSLEQEK   | 2089.0 | F1SS64 | Myosin-1 (Fragment) |
| LEQQVDDLEGSLEQEK     | 1859.9 | F1SS64 | Myosin-1 (Fragment) |
| QLDEKDTLVSQLSR       | 1631.9 | F1SS62 | Myosin-1 (Fragment) |
| TKLEQQVDDLEGSLEQEKK  | 2217.1 | F1SS64 | Myosin-1 (Fragment) |
| QAEEAEEQSNVNLK       | 1675.8 | Q95249 | Myosin-1 (Fragment) |
| DIDDLELTLAK          | 1245.7 | F1SS66 | Myosin-1 (Fragment) |
| LQNEVEDLMIDVER       | 1702.8 | F1SS62 | Myosin-1 (Fragment) |
| DPLNETVVGLYQK        | 1475.8 | F1SS66 | Myosin-1 (Fragment) |
| EQYEEEQEAK           | 1282.5 | F1SS66 | Myosin-1 (Fragment) |
| ANLLQAEIEELR         | 1398.8 | F1SS64 | Myosin-1 (Fragment) |
| VLNASAIPEGQFIDSK     | 1688.9 | F1SS61 | Myosin-1 (Fragment) |
| NKDPLNETVVGLYQK      | 1717.9 | F1SS66 | Myosin-1 (Fragment) |
| DLEEATLQHEATAATLR    | 1868.9 | F1SS62 | Myosin-1 (Fragment) |
| NLTEEMAGLDETIK       | 1650.8 | F1SS64 | Myosin-1 (Fragment) |
| LEQQVDDLEGSLEQEKK    | 1988.0 | F1SS64 | Myosin-1 (Fragment) |
| GSSFQTVSALFR         | 1299.7 | F1SS64 | Myosin-1 (Fragment) |
| AEDEEEINAELTAK       | 1561.7 | F1SS64 | Myosin-1 (Fragment) |
| SQEDLKEQLAMVER       | 1675.8 | F1SS62 | Myosin-1 (Fragment) |
| AGLLGLEEMR           | 1217.7 | F1SS66 | Myosin-1 (Fragment) |
| LEEAGGATSAQIEMNK     | 1664.8 | F1SS64 | Myosin-1 (Fragment) |

|                         |        |        |            |
|-------------------------|--------|--------|------------|
| EDQVFPMPNPPK            | 1317.6 | F1SS64 | Myosin-1   |
| TLAFLFSGAQTGEAEAGGTK    | 1956.0 | F1SS64 | Myosin-1   |
| LASADIETYLLEK           | 1465.8 | F1SS66 | Myosin-1   |
| VLNASAIPEGQYIDSK        | 1704.9 | F1SS64 | Myosin-1   |
| TEAGATLTVK              | 990.5  | F1SS64 | Myosin-1   |
| DPLNDTVVGLYQK           | 1461.8 | F1SS64 | Myosin-1   |
| GQTVEQVTNAV GALAK       | 1585.9 | F1SS64 | Myosin-1 O |
| DLEEATLQHEATAAALR       | 1838.9 | F1SS66 | Myosin-1   |
| RDLEEATLQHEATAAALR      | 1995.0 | F1SS66 | Myosin-1   |
| MQGTLEDQIISANPLLEAFGNAK | 2476.2 | F1SS64 | Myosin-1   |
| DVYVPDDKKEEFVK          | 1582.8 | F1S9D6 | Myosin-7   |
| NAYEESLEHLETFK          | 1709.8 | F1S9D6 | Myosin-7   |
| NKDPLNETVVDLYK          | 1647.9 | F1S9D6 | Myosin-7   |
| GQNVQQVMYATGALAK        | 1678.9 | F1S9D6 | Myosin-7   |
| LELDDVTSNMEQIIK         | 1747.9 | F1S9D6 | Myosin-7   |
| NLTEEMAGLDEIIAK         | 1646.8 | F1S9D6 | Myosin-7   |
| VVDSLQTS LDAETR         | 1533.8 | F1S9D6 | Myosin-7   |
| LEEAGGATSVQIEMNK        | 1676.8 | F1S9D6 | Myosin-7   |
| DFELNALNAR              | 1162.6 | F1S9D6 | Myosin-7   |
| LEQHVD DLEGSLEQEK       | 1868.9 | F1S9D6 | Myosin-7   |
| MEADLSQLQTEVEEAVQECR    | 2365.1 | F1S9D6 | Myosin-7   |
| SAYLMGLNSADLLK          | 1495.8 | F1S9D6 | Myosin-7   |
| SPGVIDNPLVMHQLR         | 1675.9 | F1S9D6 | Myosin-7   |
| NLQEEISDLTEQLGSSGK      | 1948.0 | F1S9D6 | Myosin-7   |
| LLSNLFANYAGADTPVEK      | 1923.0 | F1S9D6 | Myosin-7   |
| MEGDLNEMEIQLSHANR       | 1986.9 | F1S9D6 | Myosin-7   |

|                          |        |        |                                    |
|--------------------------|--------|--------|------------------------------------|
| LEDEEEMNAELTAK           | 1637.7 | F1S9D6 | Myosin-7                           |
| LQNEIEDLMVDVER           | 1702.8 | F1S9D6 | Myosin-7                           |
| NNLLQAELEELR             | 1441.8 | F1S9D6 | Myosin-7                           |
| LEQHVDLEGSLEQEKK         | 1997.0 | F1S9D6 | Myosin-7                           |
| GTLEDQIIQANPALEAFGNAK    | 2200.1 | F1S9D6 | Myosin-7                           |
| DPLNETVVDLYK             | 1405.7 | F1S9D6 | Myosin-7                           |
| LELQSALEEEAEASLEHEEGK    | 2212.1 | F1S9D6 | Myosin-7                           |
| IPLLADVTR                | 997.6  | F1SDX9 | Peroxisredoxin-2                   |
| GCITIIGGGDTATCCAK        | 1754.8 | K7GKJ8 | Phosphoglycerate kinase (Fragment) |
| YSLEPVAVELK              | 1247.7 | K7GKJ8 | Phosphoglycerate kinase (Fragment) |
| ITLPVDFVTADKFDENAK       | 2023.0 | K7GKJ8 | Phosphoglycerate kinase (Fragment) |
| IQLINMLDK                | 1201.7 | K7GKJ8 | Phosphoglycerate kinase (Fragment) |
| ACADPAAGSVILLENLR        | 1769.9 | K7GKJ8 | Phosphoglycerate kinase (Fragment) |
| IGQATVASGIPAGWMGLDCGPESK | 2489.2 | K7GKJ8 | Phosphoglycerate kinase (Fragment) |
| VSHVSTGGGASLELLEGGK      | 1740.9 | K7GKJ8 | Phosphoglycerate kinase (Fragment) |
| ITLPVDFVTADK             | 1318.7 | K7GKJ8 | Phosphoglycerate kinase (Fragment) |
| VLPGVDALSNV              | 1083.6 | K7GKJ8 | Phosphoglycerate kinase (Fragment) |
| LGDVYVNDAFGTAHR          | 1634.8 | K7GKJ8 | Phosphoglycerate kinase (Fragment) |
| MEFDICYTSVLK             | 1521.7 | B5KJG2 | Phosphoglycerate mutase 2          |
| SFDIPPPMDEK              | 1388.6 | B5KJG2 | Phosphoglycerate mutase 2          |
| ALPFWNDEIAPQIK           | 1641.9 | B5KJG2 | Phosphoglycerate mutase 2          |
| YAGLKPGELEPTCESLK        | 1762.9 | B5KJG2 | Phosphoglycerate mutase 2          |
| FCGWFDAELSEK             | 1488.6 | B5KJG2 | Phosphoglycerate mutase 2          |
| YEFGIFNQK                | 1145.6 | F1RQQ8 | Phosphorylase (Fragment)           |
| LITAIGDVVNHPVVGDR        | 1890.0 | F1RQQ8 | Phosphorylase (Fragment)           |
| ITGGWQMEEADDWLR          | 1822.8 | F1RQQ8 | Phosphorylase (Fragment)           |

|                           |        |        |                                             |
|---------------------------|--------|--------|---------------------------------------------|
| IGEEYIADLDQLR             | 1534.8 | F1RQQ8 | Phosphorylase (Fragment)                    |
| VFADYEDYIK                | 1262.6 | F1RQQ8 | Phosphorylase (Fragment)                    |
| LLSYVDDEAFIR              | 1440.7 | F1RQQ8 | Phosphorylase (Fragment)                    |
| VIPAADLSEQISTAGTEASGTGNMK | 2448.2 | F1RQQ8 | Phosphorylase (Fragment)                    |
| IGEEYIADLDQLRK            | 1662.9 | F1RQQ8 | Phosphorylase (Fragment)                    |
| TCAYTNHTVLPEALER          | 1874.9 | F1RQQ8 | Phosphorylase (Fragment)                    |
| EAPFTNFNPSCLPACR          | 2027.9 | A7E1S9 | Putative uncharacterized protein (Fragment) |
| KGVNLPGAAVDLPAVSEK        | 1765.0 | F1SHL9 | Pyruvate kinase (Fragment)                  |
| VYVDDGLISLLVK             | 1433.8 | F1SHL9 | Pyruvate kinase (Fragment)                  |
| CDENVLWLDYK               | 1454.7 | F1SHL9 | Pyruvate kinase (Fragment)                  |
| GDLGIEIPA EK              | 1141.6 | F1SHL9 | Pyruvate kinase (Fragment)                  |
| AEGSDVANAVLDGADCIMLSGETAK | 2494.2 | F1SHL9 | Pyruvate kinase (Fragment)                  |
| AATESFASDPILYRPVAVALDTK   | 2435.3 | F1SHL9 | Pyruvate kinase (Fragment)                  |
| LDIDSPITAR                | 1197.7 | F1SHL9 | Pyruvate kinase (Fragment)                  |
| GVNLPGAAVDLPAVSEK         | 1636.9 | F1SHL9 | Pyruvate kinase (Fragment)                  |
| GPDFLVTEVENGGFLGSK        | 1865.9 | F1SHL9 | Pyruvate kinase (Fragment)                  |
| DPVQEAWAEDVDLR            | 1642.8 | F1SHL9 | Pyruvate kinase (Fragment)                  |
| LKPDPVALCADFQEDEQK        | 2103.0 | F1RUN2 | Serum albumin                               |
| VPQVSTPTLVEVAR            | 1495.8 | F1RUN2 | Serum albumin                               |
| IEALPSDISIDEGK            | 1486.8 | Q9N250 | Titin (Fragment)                            |
| LRPGSGGEKPPDEAPFTYQLK     | 2287.2 | O97771 | Titin (Fragment)                            |
| DAAIIDSTSSFTSLVLDNVNR     | 2238.1 | Q29117 | Titin (Fragment)                            |
| NNLGELINTLNAAK            | 1484.8 | D0G7F6 | Triosephosphate isomerase                   |
| VANGAFTGEISPGMIK          | 1591.8 | D0G7F6 | Triosephosphate isomerase                   |
| LPADTEVVCPPTAYIDFAR       | 2206.1 | D0G7F6 | Triosephosphate isomerase                   |
| VVLAYEPVWAIGTGK           | 1602.9 | D0G7F6 | Triosephosphate isomerase                   |

|                               |        |        |                                                                                        |
|-------------------------------|--------|--------|----------------------------------------------------------------------------------------|
| ELASQPDVDGFLVGGASLKPEFVDIINAK | 3029.6 | D0G7F6 | Triosephosphate isomerase                                                              |
| THVSEAVAQSTR                  | 1285.6 | D0G7F6 | Triosephosphate isomerase                                                              |
| TIDDLEDELYAQK                 | 1552.7 | Q2XQY5 | Tropomyosin 3                                                                          |
| IQLVEEELDR                    | 1243.7 | F1SG00 | Tropomyosin alpha-1 chain                                                              |
| AISEELDHALNDMTSI              | 1774.8 | F2Z5B6 | Tropomyosin alpha-1 chain                                                              |
| ATEDELDKYSEALKDAQEK           | 2183.0 | F2Z5B6 | Tropomyosin alpha-1 chain                                                              |
| SIDDLEDELYAQK                 | 1538.7 | F2Z5B6 | Tropomyosin alpha-1 chain                                                              |
| QLEDELVSLQK                   | 1301.7 | F2Z5B6 | Tropomyosin alpha-1 chain                                                              |
| LVIIESDLER                    | 1186.7 | F2Z5B6 | Tropomyosin alpha-1 chain                                                              |
| ATEDELDKYSEALK                | 1611.8 | F2Z5B6 | Tropomyosin alpha-1 chain                                                              |
| IDAAEEEEKYDMEIK               | 1699.8 | B3VI70 | Troponin I                                                                             |
| SVMLQIAATELEK                 | 1448.8 | B3VI70 | Troponin I                                                                             |
| VEVVDEERYDIEAK                | 1693.8 | B3VCE8 | Troponin I                                                                             |
| IPEGKVDFFDDIQK                | 1632.8 | Q75NG6 | Troponin T fast skeletal muscle type                                                   |
| VATVSLPR                      | 842.5  | C5IWV5 | Trypsinogen                                                                            |
| LGEHNIDVLEGNEQFINAAK          | 2211.1 | C5IWV5 | Trypsinogen                                                                            |
| SCAAAGTECLISGWGNTK            | 1882.8 | C5IWV5 | Trypsinogen                                                                            |
| AFYPEEISSMVLTK                | 1614.8 | I3L7U0 | Uncharacterized protein (Fragment)                                                     |
| NQVALNPQNTVFDKAK              | 1658.9 | I3L7U0 | Uncharacterized protein (Fragment)                                                     |
| IQGQGTQDYLEGLR                | 1740.9 | F1SLZ3 | Uncharacterized protein (Fragment)                                                     |
| GADPEETILNAFK                 | 1404.7 | F6PSL2 | Uncharacterized protein (Fragment)                                                     |
| EEIEQMFAAFPDPVTGNLDYK         | 2414.1 | F6PSL2 | Uncharacterized protein (Fragment)                                                     |
| SGDGQDDAGELDFSGLLK            | 1823.8 | F1SRI8 | Uncharacterized protein (Fragment)                                                     |
| VELECEVSEDDANVK               | 1735.8 | F1SRI8 | Uncharacterized protein (Fragment) OS=Sus scrofa GN=MYBPC1<br>PE=4 SV=2 - [F1SRI8_PIG] |
| FTITDLPTDAK                   | 1221.6 | F1SRI8 | Uncharacterized protein (Fragment)                                                     |



|                        |        |        |                                   |
|------------------------|--------|--------|-----------------------------------|
| DDSGVYNISLK            | 1210.6 | F1SRI8 | Uncharacterized protein (Fragment |
| GQDVSILEIAGK           | 1229.7 | F1RVL5 | Uncharacterized protein (Fragment |
| ESPVLGYFIDR            | 1295.7 | F1RVL5 | Uncharacterized protein (Fragment |
| ILTVEGLTEGSTYEFK       | 1786.9 | F1RVL5 | Uncharacterized protein (Fragment |
| NQSSLVLIGDAFK          | 1391.8 | F1RVL5 | Uncharacterized protein (Fragment |
| YAVFDLAEGK             | 1112.6 | F1RVL5 | Uncharacterized protein (Fragment |
| VIGGLPDVVTIMEGK        | 1527.8 | F1RVL5 | Uncharacterized protein (Fragment |
| IAAANLVGIGLPSDPSSELFK  | 2012.1 | F1RVL5 | Uncharacterized protein (Fragment |
| SELAYEIFDK             | 1214.6 | F1RVL5 | Uncharacterized protein (Fragment |
| GFFPQTITQEYEAIK        | 1771.9 | F1SHW9 | Uncharacterized protein (Fragment |
| TIYTAPLDMLQVTQAK       | 1793.0 | F1SHW9 | Uncharacterized protein (Fragment |
| GIGWIPLGSLEVEK         | 1497.8 | F1SHW9 | Uncharacterized protein (Fragment |
| GYDLRPDAISIK           | 1347.7 | F1SHW9 | Uncharacterized protein (Fragment |
| DIVEDPDKFYIFK          | 1628.8 | F1RK48 | Uncharacterized protein (Fragment |
| CTLLVTPDLK             | 1159.6 | I3LES8 | Uncharacterized protein (Fragment |
| VVLEGPAPWGFR           | 1327.7 | I3LLS0 | Uncharacterized protein (Fragment |
| GCFTPVVTDPIER          | 1591.8 | F1SHX0 | Uncharacterized protein (Fragment |
| LVTDTPLYVQAVK          | 1446.8 | F1SHX0 | Uncharacterized protein (Fragment |
| YTLTETPQLHAAQEAAR      | 1900.0 | F1SHX0 | Uncharacterized protein (Fragment |
| DALANYPNFTSVVDPPAVVLAK | 2301.2 | F1SHX0 | Uncharacterized protein (Fragment |
| GIGCYAYDTPDFTLAEK      | 1920.9 | F1SHX0 | Uncharacterized protein (Fragment |
| TINEVETQILTR           | 1416.8 | F1RHL9 | Uncharacterized protein           |
| ISSSNPYSTVTVDDIR       | 1753.9 | F1RHL9 | Uncharacterized protein           |
| ILASDKPYILAEELR        | 1731.0 | F1RHL9 | Uncharacterized protein           |
| ETADTDTAEQVIASFR       | 1753.8 | F1RHL9 | Uncharacterized protein           |
| SGSLAVDNADPILK         | 1399.7 | F1S557 | Uncharacterized protein           |

|                          |        |               |                         |
|--------------------------|--------|---------------|-------------------------|
| GFLIDGYPR                | 1037.5 | F1S9R3        | Uncharacterized protein |
| TASEMVLADDNFSTIVA AVEEGR | 2441.1 | F1RFH9        | Uncharacterized protein |
| SLPSVETLGCTSVICSDK       | 1952.9 | F1RFH9        | Uncharacterized protein |
| VGEATETALTTLVEK          | 1561.8 | F1RFH9        | Uncharacterized protein |
| EFDDLPLPEQR              | 1358.7 | F1RFH9        | Uncharacterized protein |
| VDQSILTGESVSVIK          | 1574.9 | F1RFH9        | Uncharacterized protein |
| ISLPVIGLDEILK            | 1409.9 | F1RFH9        | Uncharacterized protein |
| DIVPGDIVEVAVGDK          | 1525.8 | F1RFH9        | Uncharacterized protein |
| VPLILGSPDDVQEYLTCVQK     | 2274.2 | F1S4J7        | Uncharacterized protein |
| FTAVEDQYYCVDCYK          | 1960.8 | K7GS06        | Uncharacterized protein |
| FVFHQEQVYCPDCAK          | 1927.8 | K7GS06        | Uncharacterized protein |
| GAGTGGLGLAIEGPSEAK       | 1584.8 | F1SMN5        | Uncharacterized protein |
| EAGAGGLSIAVEGPSK         | 1442.7 | F1SMN5        | Uncharacterized protein |
| AFGPGLEGGLVNK            | 1258.7 | F1SMN5        | Uncharacterized protein |
| SPFVVNVAPPLDLSK          | 1582.9 | F1SMN5        | Uncharacterized protein |
| TSQLNVGTSTDVSLK          | 1549.8 | F1SMN5        | Uncharacterized protein |
| VTYCPTEPGTYIINIK         | 1868.9 | F1SMN5        | Uncharacterized protein |
| DLTVDSASPVYQAVIK         | 1705.9 | F1SEN8        | Uncharacterized protein |
| CQLEINFNTLQTK            | 1608.8 | F1RU49;F1RHL9 | Uncharacterized protein |
| LAAGMAGSLEEQMAGLR        | 1704.8 | F1RU49        | Uncharacterized protein |
| ACLISMGYDLGEVEFAR        | 1930.9 | F1RU49        | Uncharacterized protein |
| ETAETDTAEQVVASFK         | 1725.8 | F1RU49        | Uncharacterized protein |
| EGLLLWCQR                | 1174.6 | F1RU49;F1RHL9 | Uncharacterized protein |
| GAILGIQGEIQK             | 1226.7 | F1RU49        | Uncharacterized protein |
| ELPAEQAEYCIR             | 1478.7 | F1RU49        | Uncharacterized protein |
| AGTQIENIEEDFR            | 1521.7 | F1RU49;F1RHL9 | Uncharacterized protein |

|                   |        |               |                         |
|-------------------|--------|---------------|-------------------------|
| FAIQDISVEETSAK    | 1537.8 | F1RU49;F1RHL9 | Uncharacterized protein |
| MLDAEDIVNTPKPDEK  | 1830.9 | F1RU49        | Uncharacterized protein |
| LVSIGAEIIVDGNLK   | 1556.9 | F1RU49        | Uncharacterized protein |
| TINEVENQVLTR      | 1415.7 | F1RU49        | Uncharacterized protein |
| DDPIGNLNTAFEVAEK  | 1732.8 | F1RU49        | Uncharacterized protein |
| LVSDIANAWR        | 1144.6 | F1RU49        | Uncharacterized protein |
| KDDPIGNLNTAFEVAEK | 1860.9 | F1RU49        | Uncharacterized protein |
| GYEDWLLSEIR       | 1380.7 | F1RU49        | Uncharacterized protein |
| LEGDHQLLQESLVFDNK | 1985.0 | F1RU49        | Uncharacterized protein |
| FLANVSTVLTSK      | 1279.7 | K7GLP2        | Uncharacterized protein |
| CTLADDAAYEVAVK    | 1525.7 | F1RH20        | Uncharacterized protein |
| YDGGQPVTGYLLER    | 1567.8 | F1RH20        | Uncharacterized protein |
| VVDVPDPPEAVR      | 1292.7 | F1RH20        | Uncharacterized protein |
| ADISSFVIESAER     | 1423.7 | F1RH20        | Uncharacterized protein |

---

Table S6 Common proteins identified in digestion products of DTT untreated pork products

| Accession | Description                                                        | MW(kDa) | Cluster |
|-----------|--------------------------------------------------------------------|---------|---------|
| I3LVD5    | Actin, cytoplasmic 1                                               | 41.8    |         |
| B6VNT8    | Cardiac muscle alpha actin 1                                       | 42.0    |         |
| B6A7R3    | Carbonic anhydrase IIIb                                            | 20.4    |         |
| Q95249    | Myosin heavy chain (Fragment)                                      | 25.1    |         |
| F1SNW4    | MYL3                                                               | 21.8    |         |
| O46422    | Myosin heavy chain isoform fast type (Fragment)                    | 11.5    |         |
| F1RJW7    | Calsequestrin                                                      | 45.8    | NC1     |
| B2ZFN7    | Actin (Fragment)                                                   | 27.4    |         |
| F1SS64    | Myosin-1                                                           | 223.0   |         |
| F1SS62    | Myosin-1 (Fragment)                                                | 170.2   |         |
| F1RNU9    | Glucose-6-phosphate isomerase                                      | 62.9    |         |
| B3VI70    | Troponin I                                                         | 21.3    |         |
| F1S9D6    | Myosin-7                                                           | 223.0   |         |
| G3CKJ2    | Glyceraldehyde-3-phosphate dehydrogenase (Fragment)                | 29.5    |         |
| F1RPS8    | ATP synthase subunit alpha heart isoform, mitochondrial (Fragment) | 57.6    |         |
| Q0QEM6    | ATP synthase subunit beta (Fragment)                               | 47.1    |         |
| A1XQT6    | MLC1f                                                              | 20.9    |         |
| D2JYW4    | F-actin capping protein beta subunit variant II                    | 31.3    |         |
| I3LP41    | Malate dehydrogenase                                               | 35.5    |         |
| B1Q039    | CRYAB O                                                            | 20.1    |         |
| I3LK59    | Enolase                                                            | 38.1    |         |
| A1XQV5    | Fast skeletal muscle troponin C                                    | 18.1    |         |
| Q5IZV0    | Heat shock protein 27kDa (Fragment)                                | 14.2    |         |
| F1RII7    | Hemoglobin subunit beta                                            | 16.2    |         |
| I3LBJ8    | Creatine kinase M-type                                             | 42.9    |         |
| B5KJG2    | Phosphoglycerate mutase 2                                          | 28.7    | NC2     |
| K7GKJ8    | Phosphoglycerate kinase (Fragment)                                 | 40.2    |         |
| Q1AG05    | Calsarcin 3                                                        | 26.5    |         |
| O02855    | Cytosolic glycerol-3-phosphate dehydrogenase (Fragment)            | 19.9    |         |
| Q6UV40    | Fructose-bisphosphate aldolase A (Fragment)                        | 12.0    |         |
| Q75NH0    | Troponin T fast skeletal muscle type                               | 29.8    |         |
| Q1HL06    | 6-phosphofructokinase (Fragment)                                   | 81.6    |         |
| Q2XQY5    | Tropomyosin 3                                                      | 28.9    |         |
| A5A8V6    | Heat shock 70kDa protein 1A                                        | 70.1    |         |
| D0G784    | Phosphoglycerate kinase (Fragment)                                 | 35.4    |         |
| Q75NG6    | Troponin T fast skeletal muscle type                               | 29.8    |         |
| Q8MKF3    | Beta-tropomyosin (Fragment)                                        | 17.8    |         |
| K9IVQ6    | Plectin (Fragment)                                                 | 402.7   |         |

|         |                                                     |      |     |
|---------|-----------------------------------------------------|------|-----|
| F1RJ25  | Fructose-bisphosphate aldolase                      | 39.4 |     |
| F1RQQ8  | Phosphorylase                                       | 97.2 |     |
| D2SW96  | L-lactate dehydrogenase                             | 36.6 |     |
| F1SHL9  | Pyruvate kinase (Fragment)                          | 58.7 |     |
| A1XQT5  | HUMMLC2B                                            | 19.0 |     |
| F2Z5B6  | Tropomyosin alpha-1 chain                           | 32.7 |     |
| Q7M337  | Creatine kinase chain M2 (Fragment)                 | 5.4  |     |
| Q29117  | Titin (Fragment)                                    | 62.9 |     |
| Q6T4P3  | Phosphoglycerate kinase (Fragment)                  | 12.3 | NC3 |
| A0SNU7  | Glyceraldehyde-3-phosphate dehydrogenase (Fragment) | 27.8 |     |
| C5I WV5 | Trypsinogen                                         | 25.9 |     |
| O97771  | Titin (Fragment)                                    | 24.4 |     |

NC1, NC2, NC3 indicate proteins that were divided into three regions after cluster analysis

Table S7 Common proteins identified in digestion products of DTT treated pork products

| Accession | Description                                                        | MW(kDa) | Cluster |
|-----------|--------------------------------------------------------------------|---------|---------|
| F1SRC5    | Aconitate hydratase, mitochondrial (Fragment)                      | 84.3    |         |
| I3LVD5    | Actin, cytoplasmic 1                                               | 41.8    |         |
| B6VNT8    | Cardiac muscle alpha actin 1                                       | 42.0    |         |
| D2XN65    | Glycerol-3-phosphate dehydrogenase 1                               | 37.7    |         |
| F1SS62    | Myosin-1 (Fragment)                                                | 170.2   | DC1     |
| H6SHX6    | Myosin, heavy chain 7, cardiac muscle, beta (Fragment)             | 10.0    |         |
| F1SS64    | Myosin-1                                                           | 223.0   |         |
| F1S9D6    | Myosin-7                                                           | 223.0   |         |
| Q5IZV0    | Heat shock protein 27kDa (Fragment)                                | 14.2    |         |
| A1XQV5    | Fast skeletal muscle troponin C                                    | 18.1    |         |
| F1RNU9    | Glucose-6-phosphate isomerase                                      | 62.9    |         |
| F1RJW7    | Calsequestrin                                                      | 45.8    |         |
| A1XQT6    | MLC1f                                                              | 20.9    |         |
| B5KJG2    | Phosphoglycerate mutase 2                                          | 28.7    | DC2     |
| A6NA29    | Adenosine monophosphate deaminase 1                                | 86.5    |         |
| D2SW96    | L-lactate dehydrogenase                                            | 36.6    |         |
| F1RJ25    | Fructose-bisphosphate aldolase                                     | 39.4    |         |
| A7E1S9    | Putative uncharacterized protein (Fragment)                        | 22.9    |         |
| B3VI70    | Troponin I                                                         | 21.3    |         |
| D3GGC5    | Actinin-associated LIM protein 1a                                  | 39.5    |         |
| F1RFU5    | Aspartate aminotransferase (Fragment)                              | 24.1    |         |
| Q6UV40    | Fructose-bisphosphate aldolase A (Fragment)                        | 12.0    | DC3     |
| B6A7R3    | Carbonic anhydrase IIIb                                            | 20.4    |         |
| Q29117    | Titin (Fragment)                                                   | 62.9    |         |
| F1RQQ8    | Phosphorylase                                                      | 97.2    |         |
| F1RPS8    | ATP synthase subunit alpha heart isoform, mitochondrial (Fragment) | 57.6    |         |
| Q9TUY2    | Glyceraldehyde-3-phosphate dehydrogenase (Fragment)                | 19.9    |         |
| A0SNU7    | Glyceraldehyde-3-phosphate dehydrogenase (Fragment)                | 27.8    |         |
| Q1AG05    | Calsarcin 3                                                        | 26.5    |         |
| I3LBJ8    | Creatine kinase M-type                                             | 42.9    |         |
| B3VCE8    | Troponin I                                                         | 21.6    |         |
| A1EAJ7    | Bridging integrator 1                                              | 47.9    | DC4     |
| Q0QEM6    | ATP synthase subunit beta (Fragment)                               | 47.1    |         |
| C5I WV5   | Trypsinogen                                                        | 25.9    |         |
| Q95249    | Myosin heavy chain (Fragment)                                      | 25.1    |         |
| A0PFK6    | F-actin capping protein subunit alpha 2                            | 33.0    |         |
| K7GKJ8    | Phosphoglycerate kinase (Fragment)                                 | 40.2    |         |
| F1RM74    | Glyceraldehyde-3-phosphate dehydrogenase                           | 39.3    |         |
| Q1HL06    | 6-phosphofructokinase (Fragment)                                   | 81.6    |         |

|        |                                            |       |     |
|--------|--------------------------------------------|-------|-----|
| F1SNW4 | MYL3                                       | 21.8  |     |
| F2Z5B6 | Tropomyosin alpha-1 chain                  | 32.7  |     |
| Q2XQY5 | Tropomyosin 3                              | 28.9  |     |
| B1Q039 | CRYAB                                      | 20.1  |     |
| Q75NG6 | Troponin T fast skeletal muscle type       | 29.8  |     |
| B1A3A0 | Beta-enolase 3 transcript variant 1        | 47.1  |     |
| F1RII7 | Hemoglobin subunit beta                    | 16.2  |     |
| F1SHL9 | Pyruvate kinase (Fragment)                 | 58.7  |     |
| A1XQT5 | HUMMLC2B OS=Sus scrofa                     | 19.0  |     |
| F1SK00 | Isocitrate dehydrogenase [NADP] (Fragment) | 46.6  | DC5 |
| F1RUN2 | Serum albumin                              | 69.6  |     |
| I3LP41 | Malate dehydrogenase                       | 35.5  |     |
| I3LBY9 | Malate dehydrogenase                       | 29.8  |     |
| K9IVQ6 | Plectin (Fragment)                         | 402.7 |     |
| Q29568 | Phosphopyruvate hydratase (Fragment)       | 16.1  |     |

DC1, DC2, DC3 indicate proteins that were divided into five regions after cluster analysis

Table S8 Mapping of non-DTT-treated, digested products to the myosin-2 sequences. Peptides marked with yellow and blue color are detectable. Different colors of highlights were used to distinguish the peptides just next to each other. The grey part was not detected in the DTT-untreated samples but detectable in the DTT-treated samples.

**(1-5)**

|                       |                        |                      |                      |
|-----------------------|------------------------|----------------------|----------------------|
| Raw pork              | MSSDQEMAIIFGEAAPYLRS   | EKERIEAQNRPFDAK      | TSVFFV               |
| Emulsion-type         | MSSDQEMAIIFGEAAPYLRS   | EKERIEAQNRPFDAK      | TSVFFV               |
| Dry-cured pork        | MSSDQEMAIIFGEAAPYLRS   | EKERIEAQNRPFDAK      | TSVFFV               |
| Stewed pork           | MSSDQEMAIIFGEAAPYLRS   | EKERIEAQNRPFDAK      | TSVFFV               |
| Raw pork              | AEPKESFVKGTIQSREGGKV   | TVKTEAGATLTVK        | EDQVFPM              |
| Cooked pork           | AEPKESFVKGTIQSREGGKV   | TVKTEAGATLTVK        | EDQVFPM              |
| Emulsion-type sausage | AEPKESFVKGTIQSREGGKV   | TVKTEAGATLTVK        | EDQVFPM              |
| Dry-cured pork        | AEPKESFVKGTIQSREGGKV   | TVKTEAGATLTVK        | EDQVFPM              |
| Stewed pork           | AEPKESFVKGTIQSREGGKV   | TVKTEAGATLTVK        | EDQVFPM              |
| Raw pork              | NPPKFDKIEDMAMMTHLHEP   | GVLYNLKERYAAWMIYTYSG |                      |
| Cooked pork           | NPPKFDKIEDMAMMTHLHEP   | GVLYNLKERYAAWMIYTYSG |                      |
| Emulsion-type sausage | NPPKFDKIEDMAMMTHLHEP   | GVLYNLKERYAAWMIYTYSG |                      |
| Dry-cured pork        | NPPKFDKIEDMAMMTHLHEP   | GVLYNLKERYAAWMIYTYSG |                      |
| Stewed pork           | NPPKFDKIEDMAMMTHLHEP   | GVLYNLKERYAAWMIYTYSG |                      |
| Raw pork              | LFCVTVNPNYKWLVPVYNPEVV | TAYRGKKRQEAPPHIFSISD |                      |
| Cooked pork           | LFCVTVNPNYKWLVPVYNPEVV | TAYRGKKRQEAPPHIFSISD |                      |
| Emulsion-type sausage | LFCVTVNPNYKWLVPVYNPEVV | TAYRGKKRQEAPPHIFSISD |                      |
| Dry-cured pork        | LFCVTVNPNYKWLVPVYNPEVV | TAYRGKKRQEAPPHIFSISD |                      |
| Stewed pork           | LFCVTVNPNYKWLVPVYNPEVV | TAYRGKKRQEAPPHIFSISD |                      |
| Raw pork              | NAYQFMLTDRE            | ENQSILITGE           | SGAGKTVNTRKVIQYFATIA |
| Cooked pork           | NAYQFMLTDRE            | ENQSILITGE           | SGAGKTVNTRKVIQYFATIA |
| Emulsion-type sausage | NAYQFMLTDRE            | ENQSILITGE           | SGAGKTVNTRKVIQYFATIA |
| Dry-cured pork        | NAYQFMLTDRE            | ENQSILITGE           | SGAGKTVNTRKVIQYFATIA |
| Stewed pork           | NAYQFMLTDRE            | ENQSILITGE           | SGAGKTVNTRKVIQYFATIA |

**(6-10)**

|                       |       |            |        |                      |
|-----------------------|-------|------------|--------|----------------------|
| Raw pork              | VTGEK | KKKEEPTSGK | MQGTLE | DQIISANPLLEAFGNAKTVR |
| Cooked pork           | VTGEK | KKKEEPTSGK | MQGTLE | DQIISANPLLEAFGNAKTVR |
| Emulsion-type sausage | VTGEK | KKKEEPTSGK | MQGTLE | DQIISANPLLEAFGNAKTVR |
| Dry-cured pork        | VTGEK | KKKEEPTSGK | MQGTLE | DQIISANPLLEAFGNAKTVR |
| Stewed pork           | VTGEK | KKKEEPTSGK | MQGTLE | DQIISANPLLEAFGNAKTVR |



|                       |                                   |                      |
|-----------------------|-----------------------------------|----------------------|
| Raw pork              | NDNSSRFGKFIRIHF <sup>GT</sup> TGK | LASADIETYLLEKSRVTFQL |
| Cooked pork           | NDNSSRFGKFIRIHF <sup>GT</sup> TGK | LASADIETYLLEKSRVTFQL |
| Emulsion-type sausage | NDNSSRFGKFIRIHF <sup>GT</sup> TGK | LASADIETYLLEKSRVTFQL |
| Dry-cured pork        | NDNSSRFGKFIRIHF <sup>GT</sup> TGK | LASADIETYLLEKSRVTFQL |
| Stewed pork           | NDNSSRFGKFIRIHF <sup>GT</sup> TGK | LASADIETYLLEKSRVTFQL |

|                       |                      |                     |
|-----------------------|----------------------|---------------------|
| Raw pork              | KAERSYHIFYQITSNRKPEL | IEMLLITTPYDYPFISQGE |
| Cooked pork           | KAERSYHIFYQITSNRKPEL | IEMLLITTPYDYPFISQGE |
| Emulsion-type sausage | KAERSYHIFYQITSNRKPEL | IEMLLITTPYDYPFISQGE |
| Dry-cured pork        | KAERSYHIFYQITSNRKPEL | IEMLLITTPYDYPFISQGE |
| Stewed pork           | KAERSYHIFYQITSNRKPEL | IEMLLITTPYDYPFISQGE |

|                       |                      |                      |
|-----------------------|----------------------|----------------------|
| Raw pork              | ISVASIDDQEELIATDSAID | ILGFTNEEKVSIYKLTGAVM |
| Cooked pork           | ISVASIDDQEELIATDSAID | ILGFTNEEKVSIYKLTGAVM |
| Emulsion-type sausage | ISVASIDDQEELIATDSAID | ILGFTNEEKVSIYKLTGAVM |
| Dry-cured pork        | ISVASIDDQEELIATDSAID | ILGFTNEEKVSIYKLTGAVM |
| Stewed pork           | ISVASIDDQEELIATDSAID | ILGFTNEEKVSIYKLTGAVM |

|                       |                                          |                |
|-----------------------|------------------------------------------|----------------|
| Raw pork              | HYGNLKF <sup>KQ</sup> KQREEQAEPDG TEVADK | AAYLQSLNSADLLK |
| Cooked pork           | HYGNLKF <sup>KQ</sup> KQREEQAEPDG TEVADK | AAYLQSLNSADLLK |
| Emulsion-type sausage | HYGNLKF <sup>KQ</sup> KQREEQAEPDG TEVADK | AAYLQSLNSADLLK |
| Dry-cured pork        | HYGNLKF <sup>KQ</sup> KQREEQAEPDG TEVADK | AAYLQSLNSADLLK |
| Stewed pork           | HYGNLKF <sup>KQ</sup> KQREEQAEPDG TEVADK | AAYLQSLNSADLLK |

**(11-15)**

|                       |                                   |                      |
|-----------------------|-----------------------------------|----------------------|
| Raw pork              | ALCYPRVKVGNE <sup>YV</sup> TKGQTV | EQVTNAVGALAKAVYEKMFL |
| Cooked pork           | ALCYPRVKVGNE <sup>YV</sup> TKGQTV | EQVTNAVGALAKAVYEKMFL |
| Emulsion-type sausage | ALCYPRVKVGNE <sup>YV</sup> TKGQTV | EQVTNAVGALAKAVYEKMFL |
| Dry-cured pork        | ALCYPRVKVGNE <sup>YV</sup> TKGQTV | EQVTNAVGALAKAVYEKMFL |
| Stewed pork           | ALCYPRVKVGNE <sup>YV</sup> TKGQTV | EQVTNAVGALAKAVYEKMFL |

|                       |                                   |                      |
|-----------------------|-----------------------------------|----------------------|
| Raw pork              | WMVTRIN <sup>QQLD</sup> TKQPRQYFI | GVLDIAGFEIFDFNSLEQLC |
| Cooked pork           | WMVTRIN <sup>QQLD</sup> TKQPRQYFI | GVLDIAGFEIFDFNSLEQLC |
| Emulsion-type sausage | WMVTRIN <sup>QQLD</sup> TKQPRQYFI | GVLDIAGFEIFDFNSLEQLC |
| Dry-cured pork        | WMVTRIN <sup>QQLD</sup> TKQPRQYFI | GVLDIAGFEIFDFNSLEQLC |
| Stewed pork           | WMVTRIN <sup>QQLD</sup> TKQPRQYFI | GVLDIAGFEIFDFNSLEQLC |

|                       |                      |                      |
|-----------------------|----------------------|----------------------|
| Raw pork              | INFTNEKLQQFFNHHMFVLE | QEEYKREGIEWTFIDFGMDL |
| Cooked pork           | INFTNEKLQQFFNHHMFVLE | QEEYKREGIEWTFIDFGMDL |
| Emulsion-type sausage | INFTNEKLQQFFNHHMFVLE | QEEYKREGIEWTFIDFGMDL |
| Dry-cured pork        | INFTNEKLQQFFNHHMFVLE | QEEYKREGIEWTFIDFGMDL |
| Stewed pork           | INFTNEKLQQFFNHHMFVLE | QEEYKREGIEWTFIDFGMDL |

|                       |                      |                      |
|-----------------------|----------------------|----------------------|
| Raw pork              | AACIELIEKPMGIFSILEEE | CMFPKATDTSFKNKLYEQHL |
| Cooked pork           | AACIELIEKPMGIFSILEEE | CMFPKATDTSFKNKLYEQHL |
| Emulsion-type sausage | AACIELIEKPMGIFSILEEE | CMFPKATDTSFKNKLYEQHL |
| Dry-cured pork        | AACIELIEKPMGIFSILEEE | CMFPKATDTSFKNKLYEQHL |
| Stewed pork           | AACIELIEKPMGIFSILEEE | CMFPKATDTSFKNKLYEQHL |

|                       |                       |                      |
|-----------------------|-----------------------|----------------------|
| Raw pork              | GK SANFQKPKPAKGKVEAHF | SLIHYAGTVDYNITGWLDKN |
| Cooked pork           | GK SANFQKPKPAKGKVEAHF | SLIHYAGTVDYNITGWLDKN |
| Emulsion-type sausage | GK SANFQKPKPAKGKVEAHF | SLIHYAGTVDYNITGWLDKN |
| Dry-cured pork        | GK SANFQKPKPAKGKVEAHF | SLIHYAGTVDYNITGWLDKN |
| Stewed pork           | GK SANFQKPKPAKGKVEAHF | SLIHYAGTVDNITGWLDKN  |

**(16-20)**

|                       |                      |                       |
|-----------------------|----------------------|-----------------------|
| Raw pork              | KDPLNDTVVGLYQKSALKTL | AFLFSGAQTGEAEAGGTTKKG |
| Cooked pork           | KDPLNDTVVGLYQKSALKTL | AFLFSGAQTGEAEAGGTTKKG |
| Emulsion-type sausage | KDPLNDTVVGLYQKSALKTL | AFLFSGAQTGEAEAGGTTKKG |
| Dry-cured pork        | KDPLNDTVVGLYQKSALKTL | AFLFSGAQTGEAEAGGTTKKG |
| Stewed pork           | KDPLNDTVVGLYQKSALKTL | AFLFSGAQTGEAEAGGTTKKG |

|                       |                      |                      |
|-----------------------|----------------------|----------------------|
| Raw pork              | GKKKGSSFQTVSALFRENLN | KLMTNLRSTHHPFVRCIIPN |
| Cooked pork           | GKKKGSSFQTVSALFRENLN | KLMTNLRSTHHPFVRCIIPN |
| Emulsion-type sausage | GKKKGSSFQTVSALFRENLN | KLMTNLRSTHHPFVRCIIPN |
| Dry-cured pork        | GKKKGSSFQTVSALFRENLN | KLMTNLRSTHHPFVRCIIPN |
| Stewed pork           | GKKKGSSFQTVSALFRENLN | KLMTNLRSTHHPFVRCIIPN |

|                       |                      |                       |
|-----------------------|----------------------|-----------------------|
| Raw pork              | ETKTPGAMEHELVLHQLRCN | GVLEGIRICRKGFP SRILYA |
| Cooked pork           | ETKTPGAMEHELVLHQLRCN | GVLEGIRICRKGFP SRILYA |
| Emulsion-type sausage | ETKTPGAMEHELVLHQLRCN | GVLEGIRICRKGFP SRILYA |
| Dry-cured pork        | ETKTPGAMEHELVLHQLRCN | GVLEGIRICRKGFP SRILYA |
| Stewed pork           | ETKTPGAMEHELVLHQLRCN | GVLEGIRICRKGFP SRILYA |

|                       |                      |                      |
|-----------------------|----------------------|----------------------|
| Raw pork              | DFKQRYKVLNASAIPEGQYI | DSKKASEKLLASIDIDHTQY |
| Cooked pork           | DFKQRYKVLNASAIPEGQYI | DSKKASEKLLASIDIDHTQY |
| Emulsion-type sausage | DFKQRYKVLNASAIPEGQYI | DSKKASEKLLASIDIDHTQY |
| Dry-cured pork        | DFKQRYKVLNASAIPEGQYI | DSKKASEKLLASIDIDHTQY |
| Stewed pork           | DFKQRYKVLNASAIPEGQYI | DSKKASEKLLASIDIDHTQY |

|                       |                      |                      |
|-----------------------|----------------------|----------------------|
| Raw pork              | KFGHTKVFFKAGLLGLLEEM | RDDKLAQLITRTQARCRGFL |
| Cooked pork           | KFGHTKVFFKAGLLGLLEEM | RDDKLAQLITRTQARCRGFL |
| Emulsion-type sausage | KFGHTKVFFKAGLLGLLEEM | RDDKLAQLITRTQARCRGFL |
| Dry-cured pork        | KFGHTKVFFKAGLLGLLEEM | RDDKLAQLITRTQARCRGFL |
| Stewed pork           | KFGHTKVFFKAGLLGLLEEM | RDDKLAQLITRTQARCRGFL |

**(21-25)**

|                       |                      |                      |
|-----------------------|----------------------|----------------------|
| Raw pork              | ARVEYQKMVERRESIFCIQY | NIRAFMNVKHWPWMKLFFKI |
| Cooked pork           | ARVEYQKMVERRESIFCIQY | NIRAFMNVKHWPWMKLFFKI |
| Emulsion-type sausage | ARVEYQKMVERRESIFCIQY | NIRAFMNVKHWPWMKLFFKI |
| Dry-cured pork        | ARVEYQKMVERRESIFCIQY | NIRAFMNVKHWPWMKLFFKI |
| Stewed pork           | ARVEYQKMVERRESIFCIQY | NIRAFMNVKHWPWMKLFFKI |

|                       |                      |                      |
|-----------------------|----------------------|----------------------|
| Raw pork              | KPLLKSAETEKEMATMKEEF | QKTKDELAKSEAKRKELEEK |
| Cooked pork           | KPLLKSAETEKEMATMKEEF | QKTKDELAKSEAKRKELEEK |
| Emulsion-type sausage | KPLLKSAETEKEMATMKEEF | QKTKDELAKSEAKRKELEEK |
| Dry-cured pork        | KPLLKSAETEKEMATMKEEF | QKTKDELAKSEAKRKELEEK |
| Stewed pork           | KPLLKSAETEKEMATMKEEF | QKTKDELAKSEAKRKELEEK |

|                       |                      |                      |
|-----------------------|----------------------|----------------------|
| Raw pork              | MVTLLKEKNDLQLQVQAEAE | GLADAEERCDQLIKTKIQLE |
| Cooked pork           | MVTLLKEKNDLQLQVQAEAE | GLADAEERCDQLIKTKIQLE |
| Emulsion-type sausage | MVTLLKEKNDLQLQVQAEAE | GLADAEERCDQLIKTKIQLE |
| Dry-cured pork        | MVTLLKEKNDLQLQVQAEAE | GLADAEERCDQLIKTKIQLE |
| Stewed pork           | MVTLLKEKNDLQLQVQAEAE | GLADAEERCDQLIKTKIQLE |

|                       |                      |                      |
|-----------------------|----------------------|----------------------|
| Raw pork              | AKIKEVTERAEDEEEINAEL | TAKKRKLEDECSELKKDIDD |
| Cooked pork           | AKIKEVTERAEDEEEINAEL | TAKKRKLEDECSELKKDIDD |
| Emulsion-type sausage | AKIKEVTERAEDEEEINAEL | TAKKRKLEDECSELKKDIDD |
| Dry-cured pork        | AKIKEVTERAEDEEEINAEL | TAKKRKLEDECSELKKDIDD |
| Stewed pork           | AKIKEVTERAEDEEEINAEL | TAKKRKLEDECSELKKDIDD |

|                       |                      |                      |
|-----------------------|----------------------|----------------------|
| Raw pork              | LELTLAKVEKEKHATENKVK | NLTEEMAGLDETIAKLTKEK |
| Cooked pork           | LELTLAKVEKEKHATENKVK | NLTEEMAGLDETIAKLTKEK |
| Emulsion-type sausage | LELTLAKVEKEKHATENKVK | NLTEEMAGLDETIAKLTKEK |
| Dry-cured pork        | LELTLAKVEKEKHATENKVK | NLTEEMAGLDETIAKLTKEK |
| Stewed pork           | LELTLAKVEKEKHATENKVK | NLTEEMAGLDETIAKLTKEK |

**(26-30)**

|                       |                       |                    |
|-----------------------|-----------------------|--------------------|
| Raw pork              | KALQEAHQQTLLDDLQAEEDK | VNLTAKTKLEQQVDDLEG |
| Cooked pork           | KALQEAHQQTLLDDLQAEEDK | VNLTAKTKLEQQVDDLEG |
| Emulsion-type sausage | KALQEAHQQTLLDDLQAEEDK | VNLTAKTKLEQQVDDLEG |
| Dry-cured pork        | KALQEAHQQTLLDDLQAEEDK | VNLTAKTKLEQQVDDLEG |
| Stewed pork           | KALQEAHQQTLLDDLQAEEDK | VNLTAKTKLEQQVDDLEG |

|                       |                      |                      |
|-----------------------|----------------------|----------------------|
| Raw pork              | SLEQEKKLRMDLERAKRKLE | GDLKLAQESIMDIENEKQQL |
| Cooked pork           | SLEQEKKLRMDLERAKRKLE | GDLKLAQESIMDIENEKQQL |
| Emulsion-type sausage | SLEQEKKLRMDLERAKRKLE | GDLKLAQESIMDIENEKQQL |
| Dry-cured pork        | SLEQEKKLRMDLERAKRKLE | GDLKLAQESIMDIENEKQQL |

Stewed pork SLEQEKKLRMDLERAKRikle GDLKLAQESIMDIENEKQQL

Raw pork DEKLKKKKEFEISNLQSKIED EQALAIQLQKKIKELQARIE

Cooked pork DEKLKKKKEFEISNLQSKIED EQALAIQLQKKIKELQARIE

Emulsion-type sausage DEKLKKKKEFEISNLQSKIED EQALAIQLQKKIKELQARIE

Dry-cured pork DEKLKKKKEFEISNLQSKIED EQALAIQLQKKIKELQARIE

Stewed pork DEKLKKKKEFEISNLQSKIED EQALAIQLQKKIKELQARIE

Raw pork ELEEEIEAERASRAKAEKQR SDLSRELEEISERLEEAGGA

Cooked pork ELEEEIEAERASRAKAEKQR SDLSRELEEISERLEEAGGA

Emulsion-type sausage ELEEEIEAERASRAKAEKQR SDLSRELEEISERLEEAGGA

Dry-cured pork ELEEEIEAERASRAKAEKQR SDLSRELEEISERLEEAGGA

Stewed pork ELEEEIEAERASRAKAEKQR SDLSRELEEISERLEEAGGA

Raw pork SAQIEMNKKREAEFQKMRR DLEEATLQHEATAAALRKKH

Cooked pork SAQIEMNKKREAEFQKMRR DLEEATLQHEATAAALRKKH

Emulsion-type sausage SAQIEMNKKREAEFQKMRR DLEEATLQHEATAAALRKKH

Dry-cured pork SAQIEMNKKREAEFQKMRR DLEEATLQHEATAAALRKKH

Stewed pork SAQIEMNKKREAEFQKMRR DLEEATLQHEATAAALRKKH

**(31-35)**

Raw pork ADSVAELGEQIDNLQRVKQK LEKEKSEMMEIDDLASNME

Cooked pork ADSVAELGEQIDNLQRVKQK LEKEKSEMMEIDDLASNME

Emulsion-type sausage ADSVAELGEQIDNLQRVKQK LEKEKSEMMEIDDLASNME

Dry-cured pork ADSVAELGEQIDNLQRVKQK LEKEKSEMMEIDDLASNME

Stewed pork ADSVAELGEQIDNLQRVKQK LEKEKSEMMEIDDLASNME

Raw pork TVSKAKGNLEKMCRTLEDQL SELKSKEEEQQR LINDLTAQ

Cooked pork TVSKAKGNLEKMCRTLEDQL SELKSKEEEQQR LINDLTAQ

Emulsion-type sausage TVSKAKGNLEKMCRTLEDQL SELKSKEEEQQR LINDLTAQ

Dry-cured pork TVSKAKGNLEKMCRTLEDQL SELKSKEEEQQR LINDLTAQ

Stewed pork TVSKAKGNLEKMCRTLEDQL SELKSKEEEQQR LINDLTAQ

Raw pork RGR LQTESGEFSRQLDEKEA LVSQLSRGKQAYTQQIEELK

Cooked pork RGR LQTESGEFSRQLDEKEA LVSQLSRGKQAYTQQIEELK

Emulsion-type sausage RGR LQTESGEFSRQLDEKEA LVSQLSRGKQAYTQQIEELK

Dry-cured pork RGR LQTESGEFSRQLDEKEA LVSQLSRGKQAYTQQIEELK

Stewed pork RGR LQTESGEFSRQLDEKEA LVSQLSRGKQAYTQQIEELK

Raw pork RQLEEEIKAKNALAHALQSS RHDCDLLREQYEEEQESKAE

Cooked pork RQLEEEIKAKNALAHALQSS RHDCDLLREQYEEEQESKAE

Emulsion-type sausage RQLEEEIKAKNALAHALQSS RHDCDLLREQYEEEQESKAE

Dry-cured pork RQLEEEIKAKNALAHALQSS RHDCDLLREQYEEEQESKAE

Stewed pork RQLEEEIKAKNALAHALQSS RHDCDLLREQYEEEQESKAE

|                       |         |           |      |        |                 |
|-----------------------|---------|-----------|------|--------|-----------------|
| Raw pork              | LQRALSK | ANTEVAQWR | TKYE | TDAIQR | TEELEEEAKKKLAQR |
| Cooked pork           | LQRALSK | ANTEVAQWR | TKYE | TDAIQR | TEELEEEAKKKLAQR |
| Emulsion-type sausage | LQRALSK | ANTEVAQWR | TKYE | TDAIQR | TEELEEEAKKKLAQR |
| Dry-cured pork        | LQRALSK | ANTEVAQWR | TKYE | TDAIQR | TEELEEEAKKKLAQR |
| Stewed pork           | LQRALSK | ANTEVAQWR | TKYE | TDAIQR | TEELEEEAKKKLAQR |

**(36-40)**

|                       |          |        |        |       |         |          |
|-----------------------|----------|--------|--------|-------|---------|----------|
| Raw pork              | LQAAEEHV | EAVNAK | CASLEK | TKQRL | QNEVEDL | MLDVERTN |
| Cooked pork           | LQAAEEHV | EAVNAK | CASLEK | TKQRL | QNEVEDL | MLDVERTN |
| Emulsion-type sausage | LQAAEEHV | EAVNAK | CASLEK | TKQRL | QNEVEDL | MLDVERTN |
| Dry-cured pork        | LQAAEEHV | EAVNAK | CASLEK | TKQRL | QNEVEDL | MLDVERTN |
| Stewed pork           | LQAAEEHV | EAVNAK | CASLEK | TKQRL | QNEVEDL | MLDVERTN |

|                       |         |       |          |       |                 |
|-----------------------|---------|-------|----------|-------|-----------------|
| Raw pork              | AACAALD | KKQRN | FDKILAEW | KQKYE | ETHAELEASQKEARS |
| Cooked pork           | AACAALD | KKQRN | FDKILAEW | KQKYE | ETHAELEASQKEARS |
| Emulsion-type sausage | AACAALD | KKQRN | FDKILAEW | KQKYE | ETHAELEASQKEARS |
| Dry-cured pork        | AACAALD | KKQRN | FDKILAEW | KQKYE | ETHAELEASQKEARS |
| Stewed pork           | AACAALD | KKQRN | FDKILAEW | KQKYE | ETHAELEASQKEARS |

|                       |        |     |             |     |      |               |
|-----------------------|--------|-----|-------------|-----|------|---------------|
| Raw pork              | LGTELF | KMK | NAYEESLDQLE | TLK | RENK | NLQQEISDLTEQI |
| Cooked pork           | LGTELF | KMK | NAYEESLDQLE | TLK | RENK | NLQQEISDLTEQI |
| Emulsion-type sausage | LGTELF | KMK | NAYEESLDQLE | TLK | RENK | NLQQEISDLTEQI |
| Dry-cured pork        | LGTELF | KMK | NAYEESLDQLE | TLK | RENK | NLQQEISDLTEQI |
| Stewed pork           | LGTELF | KMK | NAYEESLDQLE | TLK | RENK | NLQQEISDLTEQI |

|                       |       |                 |        |                |
|-----------------------|-------|-----------------|--------|----------------|
| Raw pork              | AEGGK | RIHELEKIKKQVEQE | KSEIQA | ALEEAEASLEHEEG |
| Cooked pork           | AEGGK | RIHELEKIKKQVEQE | KSEIQA | ALEEAEASLEHEEG |
| Emulsion-type sausage | AEGGK | RIHELEKIKKQVEQE | KSEIQA | ALEEAEASLEHEEG |
| Dry-cured pork        | AEGGK | RIHELEKIKKQVEQE | KSEIQA | ALEEAEASLEHEEG |
| Stewed pork           | AEGGK | RIHELEKIKKQVEQE | KSEIQA | ALEEAEASLEHEEG |

|                       |       |          |         |                  |      |
|-----------------------|-------|----------|---------|------------------|------|
| Raw pork              | KILRI | QLELNQVK | SEVDRKI | AEKDEEIDQLKRNHVR | VVES |
| Cooked pork           | KILRI | QLELNQVK | SEVDRKI | AEKDEEIDQLKRNHVR | VVES |
| Emulsion-type sausage | KILRI | QLELNQVK | SEVDRKI | AEKDEEIDQLKRNHVR | VVES |
| Dry-cured pork        | KILRI | QLELNQVK | SEVDRKI | AEKDEEIDQLKRNHVR | VVES |
| Stewed pork           | KILRI | QLELNQVK | SEVDRKI | AEKDEEIDQLKRNHVR | VVES |

**(41-45)**

|                       |                      |                      |
|-----------------------|----------------------|----------------------|
| Raw pork              | MQSMLDAEIRSRNDAIRLKK | KMEGDLNEMEIQLNHANRMA |
| Cooked pork           | MQSMLDAEIRSRNDAIRLKK | KMEGDLNEMEIQLNHANRMA |
| Emulsion-type sausage | MQSMLDAEIRSRNDAIRLKK | KMEGDLNEMEIQLNHANRMA |
| Dry-cured pork        | MQSMLDAEIRSRNDAIRLKK | KMEGDLNEMEIQLNHANRMA |

Stewed pork MQSMLDAEIRSRNDAIRLKK KMEGDLNEMEIQLNHANRMA

Raw pork AEALRNRYRNTQGILKDTQIH LDDALRGQEDLKEQLAMVER

Cooked pork AEALRNRYRNTQGILKDTQIH LDDALRGQEDLKEQLAMVER

Emulsion-type sausage AEALRNRYRNTQGILKDTQIH LDDALRGQEDLKEQLAMVER

Dry-cured pork AEALRNRYRNTQGILKDTQIH LDDALRGQEDLKEQLAMVER

Stewed pork AEALRNRYRNTQGILKDTQIH LDDALRGQEDLKEQLAMVER

Raw pork RANLLQAEIEELRATLEQTE RSRKVAEQELLDASERVQLL

Cooked pork RANLLQAEIEELRATLEQTE RSRKVAEQELLDASERVQLL

Emulsion-type sausage RANLLQAEIEELRATLEQTE RSRKVAEQELLDASERVQLL

Dry-cured pork RANLLQAEIEELRATLEQTE RSRKVAEQELLDASERVQLL

Stewed pork RANLLQAEIEELRATLEQTE RSRKVAEQELLDASERVQLL

Raw pork HTQNTSLINTK K KLETDISQ MQGEMEDILQEARNAEEKAK

Cooked pork HTQNTSLINTK K KLETDISQ MQGEMEDILQEARNAEEKAK

Emulsion-type sausage HTQNTSLINTK K KLETDISQ MQGEMEDILQEARNAEEKAK

Dry-cured pork HTQNTSLINTK K KLETDISQ MQGEMEDILQEARNAEEKAK

Stewed pork HTQNTSLINTK K KLETDISQ MQGEMEDILQEARNAEEKAK

Raw pork KAITDAAMMAEELKKEQDTS AHLERMKKNM EQTVKDLQHR

Cooked pork KAITDAAMMAEELKKEQDTS AHLERMKKNM EQTVKDLQHR

Emulsion-type sausage KAITDAAMMAEELKKEQDTS AHLERMKKNM EQTVKDLQHR

Dry-cured pork KAITDAAMMAEELKKEQDTS AHLERMKKNM EQTVKDLQHR

Stewed pork KAITDAAMMAEELKKEQDTS HLERMKKNM EQTVKDLQHR

(46-49)

Raw pork LDEAEQLALKGGKKQIQKLE ARVRELEGEVESEQRNAEA

Cooked pork LDEAEQLALKGGKKQIQKLE ARVRELEGEVESEQRNAEA

Emulsion-type sausage LDEAEQLALKGGKKQIQKLE ARVRELEGEVESEQRNAEA

Dry-cured pork LDEAEQLALKGGKKQIQKLE ARVRELEGEVESEQRNAEA

Stewed pork LDEAEQLALKGGKKQIQKLE ARVRELEGEVESEQRNAEA

Raw pork VKGLRKHERRVKELTYQTEE DRKNILRLQDLVDKLQAKVK

Cooked pork VKGLRKHERRVKELTYQTEE DRKNILRLQDLVDKLQAKVK

Emulsion-type sausage VKGLRKHERRVKELTYQTEE DRKNILRLQDLVDKLQAKVK

Dry-cured pork VKGLRKHERRVKELTYQTEE DRKNILRLQDLVDKLQAKVK

Stewed pork VKGLRKHERRVKELTYQTEE DRKNILRLQDLVDKLQAKVK

Raw pork SYKRQAEAAEQSNTNLSKF RKLQHELEEAERADIAESQ

Cooked pork SYKRQAEAAEQSNTNLSKF RKLQHELEEAERADIAESQ

Emulsion-type sausage SYKRQAEAAEQSNTNLSKF RKLQHELEEAERADIAESQ

Dry-cured pork SYKRQAEAAEQSNTNLSKF RKLQHELEEAERADIAESQ

Stewed pork SYKRQAEAAEQSNTNLSKF RKLQHELEEAERADIAESQ

|                       |                     |
|-----------------------|---------------------|
| Raw pork              | VNKLRVKSREVHTKVISEE |
| Cooked pork           | VNKLRVKSREVHTKVISEE |
| Emulsion-type sausage | VNKLRVKSREVHTKVISEE |
| Dry-cured pork        | VNKLRVKSREVHTKVISEE |
| Stewed pork           | VNKLRVKSREVHTKVISEE |

Table S9 Mapping of DTT-treated digested products to the myosin-2 sequences. Peptides marked with green and purple color are detectable. Different colors of highlights were used to distinguish the peptides just next to each other. The grey part was not detected in the DTT-treated samples but detectable in the DTT-untreated samples.

**(1-5)**

|                       |                                            |                                      |
|-----------------------|--------------------------------------------|--------------------------------------|
| Raw pork              | MSSDQEMAIIFGEAAPYLKRS                      | EKERIEAQNRPFDAKTSVFF                 |
| Cooked pork           | MSSDQEMAIIFGEAAPYLKRS                      | EKERIEAQNRPFDAKTSVFF                 |
| Emulsion-type         | MSSDQEMAIIFGEAAPYLKRS                      | EKERIEAQNRPFDAKTSVFF                 |
| Dry-cured pork        | MSSDQEMAIIFGEAAPYLKRS                      | EKERIEAQNRPFDAKTSVFF                 |
| Stewed pork           | MSSDQEMAIIFGEAAPYLKRS                      | EKERIEAQNRPFDAKTSVFF                 |
| Raw pork              | AEPKESFVKGTIQSREGGKV                       | TVK <b>TEAGATLTVK</b> <b>EDQVFPM</b> |
| Cooked pork           | AEPKESFVKGTIQSREGGKV                       | TVK <b>TEAGATLTVK</b> <b>EDQVFPM</b> |
| Emulsion-type sausage | AEPKESFVKGTIQSREGGKV                       | TVK <b>TEAGATLTVK</b> <b>EDQVFPM</b> |
| Dry-cured pork        | AEPKESFVKGTIQSREGGKV                       | TVK <b>TEAGATLTVK</b> <b>EDQVFPM</b> |
| Stewed pork           | AEPKESFVKGTIQSREGGKV                       | TVK <b>TEAGATLTVK</b> <b>EDQVFPM</b> |
| Raw pork              | <b>NPPK</b> FDKIEDMAMMTHLHEP               | GVLNPKERYAAWMIYTYSG                  |
| Cooked pork           | <b>NPPK</b> FDKIEDMAMMTHLHEP               | GVLNPKERYAAWMIYTYSG                  |
| Emulsion-type sausage | <b>NPPK</b> FDKIEDMAMMTHLHEP               | GVLNPKERYAAWMIYTYSG                  |
| Dry-cured pork        | <b>NPPK</b> FDKIEDMAMMTHLHEP               | GVLNPKERYAAWMIYTYSG                  |
| Stewed pork           | <b>NPPK</b> FDKIEDMAMMTHLHEP               | GVLNPKERYAAWMIYTYSG                  |
| Raw pork              | LFCVTVPYKWLVPYNPEVV                        | TAYRGKKRQEAPPHIFSISD                 |
| Cooked pork           | LFCVTVPYKWLVPYNPEVV                        | TAYRGKKRQEAPPHIFSISD                 |
| Emulsion-type sausage | LFCVTVPYKWLVPYNPEVV                        | TAYRGKKRQEAPPHIFSISD                 |
| Dry-cured pork        | LFCVTVPYKWLVPYNPEVV                        | TAYRGKKRQEAPPHIFSISD                 |
| Stewed pork           | LFCVTVPYKWLVPYNPEVV                        | TAYRGKKRQEAPPHIFSISD                 |
| Raw pork              | NAYQFMLTDRE <b>ENQSILITGE</b> <b>SGAGK</b> | TVNPKRVIQYFATIA                      |
| Cooked pork           | NAYQFMLTDRE <b>ENQSILITGE</b> <b>SGAGK</b> | TVNPKRVIQYFATIA                      |
| Emulsion-type sausage | NAYQFMLTDRE <b>ENQSILITGE</b> <b>SGAGK</b> | TVNPKRVIQYFATIA                      |
| Dry-cured pork        | NAYQFMLTDRE <b>ENQSILITGE</b> <b>SGAGK</b> | TVNPKRVIQYFATIA                      |
| Stewed pork           | NAYQFMLTDRE <b>ENQSILITGE</b> <b>SGAGK</b> | TVNPKRVIQYFATIA                      |

**(6-10)**

|                       |                                                            |
|-----------------------|------------------------------------------------------------|
| Raw pork              | VTGEKKKKEEPTSGK <b>MQGTLE</b> <b>DQIISANPLLEAFGNAK</b> TVR |
| Cooked pork           | VTGEKKKKEEPTSGK <b>MQGTLE</b> <b>DQIISANPLLEAFGNAK</b> TVR |
| Emulsion-type sausage | VTGEKKKKEEPTSGK <b>MQGTLE</b> <b>DQIISANPLLEAFGNAK</b> TVR |
| Dry-cured pork        | VTGEKKKKEEPTSGK <b>MQGTLE</b> <b>DQIISANPLLEAFGNAK</b> TVR |
| Stewed pork           | VTGEKKKKEEPTSGK <b>MQGTLE</b> <b>DQIISANPLLEAFGNAK</b> TVR |



|                       |                      |               |         |
|-----------------------|----------------------|---------------|---------|
| Raw pork              | NDNSSRFGKFIRIHFGTTGK | LASADIETYLLEK | SRVTFQL |
| Cooked pork           | NDNSSRFGKFIRIHFGTTGK | LASADIETYLLEK | SRVTFQL |
| Emulsion-type sausage | NDNSSRFGKFIRIHFGTTGK | LASADIETYLLEK | SRVTFQL |
| Dry-cured pork        | NDNSSRFGKFIRIHFGTTGK | LASADIETYLLEK | SRVTFQL |
| Stewed pork           | NDNSSRFGKFIRIHFGTTGK | LASADIETYLLEK | SRVTFQL |

|                       |                      |                     |
|-----------------------|----------------------|---------------------|
| Raw pork              | KAERSYHIFYQITSNRKPEL | IEMLLITTPYDYPFISQGE |
| Cooked pork           | KAERSYHIFYQITSNRKPEL | IEMLLITTPYDYPFISQGE |
| Emulsion-type sausage | KAERSYHIFYQITSNRKPEL | IEMLLITTPYDYPFISQGE |
| Dry-cured pork        | KAERSYHIFYQITSNRKPEL | IEMLLITTPYDYPFISQGE |
| Stewed pork           | KAERSYHIFYQITSNRKPEL | IEMLLITTPYDYPFISQGE |

|                       |                      |                |        |
|-----------------------|----------------------|----------------|--------|
| Raw pork              | ISVASIDDQEELIATDSAID | ILGFTNEEKVSIYK | LTGAVM |
| Cooked pork           | ISVASIDDQEELIATDSAID | ILGFTNEEKVSIYK | LTGAVM |
| Emulsion-type sausage | ISVASIDDQEELIATDSAID | ILGFTNEEKVSIYK | LTGAVM |
| Dry-cured pork        | ISVASIDDQEELIATDSAID | ILGFTNEEKVSIYK | LTGAVM |
| Stewed pork           | ISVASIDDQEELIATDSAID | ILGFTNEEKVSIYK | LTGAVM |

|                       |                     |                      |
|-----------------------|---------------------|----------------------|
| Raw pork              | HYGNLKFQKQREEQAEPDG | TEVADKAAYLQSLNSADLLK |
| Cooked pork           | HYGNLKFQKQREEQAEPDG | TEVADKAAYLQSLNSADLLK |
| Emulsion-type sausage | HYGNLKFQKQREEQAEPDG | TEVADKAAYLQSLNSADLLK |
| Dry-cured pork        | HYGNLKFQKQREEQAEPDG | TEVADKAAYLQSLNSADLLK |
| Stewed pork           | HYGNLKFQKQREEQAEPDG | TEVADKAAYLQSLNSADLLK |

**(11-15)**

|                       |                  |                   |          |
|-----------------------|------------------|-------------------|----------|
| Raw pork              | ALCYPRVKVGNEYVTK | GQTV EQVTNAVGALAK | AVYEKMFL |
| Cooked pork           | ALCYPRVKVGNEYVTK | GQTV EQVTNAVGALAK | AVYEKMFL |
| Emulsion-type sausage | ALCYPRVKVGNEYVTK | GQTV EQVTNAVGALAK | AVYEKMFL |
| Dry-cured pork        | ALCYPRVKVGNEYVTK | GQTV EQVTNAVGALAK | AVYEKMFL |
| Stewed pork           | ALCYPRVKVGNEYVTK | GQTV EQVTNAVGALAK | AVYEKMFL |

|                       |                      |                      |
|-----------------------|----------------------|----------------------|
| Raw pork              | WMVTRINQQLDTKQPRQYFI | GVLDIAGFEIFDFNSLEQLC |
| Cooked pork           | WMVTRINQQLDTKQPRQYFI | GVLDIAGFEIFDFNSLEQLC |
| Emulsion-type sausage | WMVTRINQQLDTKQPRQYFI | GVLDIAGFEIFDFNSLEQLC |
| Dry-cured pork        | WMVTRINQQLDTKQPRQYFI | GVLDIAGFEIFDFNSLEQLC |
| Stewed pork           | WMVTRINQQLDTKQPRQYFI | GVLDIAGFEIFDFNSLEQLC |

|                       |                     |                      |
|-----------------------|---------------------|----------------------|
| Raw pork              | INFTNEKLQQFFNHMFVLE | QEEYKREGIEWTFIDFGMDL |
| Cooked pork           | INFTNEKLQQFFNHMFVLE | QEEYKREGIEWTFIDFGMDL |
| Emulsion-type sausage | INFTNEKLQQFFNHMFVLE | QEEYKREGIEWTFIDFGMDL |
| Dry-cured pork        | INFTNEKLQQFFNHMFVLE | QEEYKREGIEWTFIDFGMDL |
| Stewed pork           | INFTNEKLQQFFNHMFVLE | QEEYKREGIEWTFIDFGMDL |

|                       |                      |                      |
|-----------------------|----------------------|----------------------|
| Raw pork              | AACIELIEKPMGIFSILEEE | CMFPKATDTSFKNKLYEQHL |
| Cooked pork           | AACIELIEKPMGIFSILEEE | CMFPKATDTSFKNKLYEQHL |
| Emulsion-type sausage | AACIELIEKPMGIFSILEEE | CMFPKATDTSFKNKLYEQHL |
| Dry-cured pork        | AACIELIEKPMGIFSILEEE | CMFPKATDTSFKNKLYEQHL |
| Stewed pork           | AACIELIEKPMGIFSILEEE | CMFPKATDTSFKNKLYEQHL |

|                       |                      |                      |
|-----------------------|----------------------|----------------------|
| Raw pork              | GKSANFQKPKPAKGKVEAHF | SLIHYAGTVDYNITGWLDKN |
| Cooked pork           | GKSANFQKPKPAKGKVEAHF | SLIHYAGTVDYNITGWLDKN |
| Emulsion-type sausage | GKSANFQKPKPAKGKVEAHF | SLIHYAGTVDYNITGWLDKN |
| Dry-cured pork        | GKSANFQKPKPAKGKVEAHF | SLIHYAGTVDYNITGWLDKN |
| Stewed pork           | GKSANFQKPKPAKGKVEAHF | SLIHYAGTVDYNITGWLDKN |

**(16-20)**

|                       |                    |                         |
|-----------------------|--------------------|-------------------------|
| Raw pork              | KDPLNDTVVGLYQKSALK | TL AFLFSGAQTGEAEAGGTKKG |
| Cooked pork           | KDPLNDTVVGLYQKSALK | TL AFLFSGAQTGEAEAGGTKKG |
| Emulsion-type sausage | KDPLNDTVVGLYQKSALK | TL AFLFSGAQTGEAEAGGTKKG |
| Dry-cured pork        | KDPLNDTVVGLYQKSALK | TL AFLFSGAQTGEAEAGGTKKG |
| Stewed pork           | KDPLNDTVVGLYQKSALK | TL AFLFSGAQTGEAEAGGTKKG |

|                       |                  |                           |
|-----------------------|------------------|---------------------------|
| Raw pork              | GKKKGSSFQTVSALFR | ENLN KLMTNLRSTHPhFVRCIIPN |
| Cooked pork           | GKKKGSSFQTVSALFR | ENLN KLMTNLRSTHPhFVRCIIPN |
| Emulsion-type sausage | GKKKGSSFQTVSALFR | ENLN KLMTNLRSTHPhFVRCIIPN |
| Dry-cured pork        | GKKKGSSFQTVSALFR | ENLN KLMTNLRSTHPhFVRCIIPN |
| Stewed pork           | GKKKGSSFQTVSALFR | ENLN KLMTNLRSTHPhFVRCIIPN |

|                       |                    |                          |
|-----------------------|--------------------|--------------------------|
| Raw pork              | ETKTPGAMEHELVLHQLR | CN GVLEGIRICRKGFP SRILYA |
| Cooked pork           | ETKTPGAMEHELVLHQLR | CN GVLEGIRICRKGFP SRILYA |
| Emulsion-type sausage | ETKTPGAMEHELVLHQLR | CN GVLEGIRICRKGFP SRILYA |
| Dry-cured pork        | ETKTPGAMEHELVLHQLR | CN GVLEGIRICRKGFP SRILYA |
| Stewed pork           | ETKTPGAMEHELVLHQLR | CN GVLEGIRICRKGFP SRILYA |

|                       |                      |                       |
|-----------------------|----------------------|-----------------------|
| Raw pork              | DFKQRYKVLNASAIPEGQYI | DSK KASEKLLASIDIDHTQY |
| Cooked pork           | DFKQRYKVLNASAIPEGQYI | DSK KASEKLLASIDIDHTQY |
| Emulsion-type sausage | DFKQRYKVLNASAIPEGQYI | DSK KASEKLLASIDIDHTQY |
| Dry-cured pork        | DFKQRYKVLNASAIPEGQYI | DSK KASEKLLASIDIDHTQY |
| Stewed pork           | DFKQRYKVLNASAIPEGQYI | DSK KASEKLLASIDIDHTQY |

|                       |                      |                      |
|-----------------------|----------------------|----------------------|
| Raw pork              | KFGHTKVFFKAGLLGLLEEM | RDDKLAQLITRTQARCRGFL |
| Cooked pork           | KFGHTKVFFKAGLLGLLEEM | RDDKLAQLITRTQARCRGFL |
| Emulsion-type sausage | KFGHTKVFFKAGLLGLLEEM | RDDKLAQLITRTQARCRGFL |
| Dry-cured pork        | KFGHTKVFFKAGLLGLLEEM | RDDKLAQLITRTQARCRGFL |
| Stewed pork           | KFGHTKVFFKAGLLGLLEEM | RDDKLAQLITRTQARCRGFL |

**(21-25)**

|                       |                      |                      |
|-----------------------|----------------------|----------------------|
| Raw pork              | ARVEYQKMVERRESIFCIQY | NIRAFMNVKHWPWMKLFCKI |
| Cooked pork           | ARVEYQKMVERRESIFCIQY | NIRAFMNVKHWPWMKLFCKI |
| Emulsion-type sausage | ARVEYQKMVERRESIFCIQY | NIRAFMNVKHWPWMKLFCKI |
| Dry-cured pork        | ARVEYQKMVERRESIFCIQY | NIRAFMNVKHWPWMKLFCKI |
| Stewed pork           | ARVEYQKMVERRESIFCIQY | NIRAFMNVKHWPWMKLFCKI |

|                       |                     |                      |
|-----------------------|---------------------|----------------------|
| Raw pork              | KPLLSAETEKEMATMKEEF | QKTKDELAKSEAKRKELEEK |
| Cooked pork           | KPLLSAETEKEMATMKEEF | QKTKDELAKSEAKRKELEEK |
| Emulsion-type sausage | KPLLSAETEKEMATMKEEF | QKTKDELAKSEAKRKELEEK |
| Dry-cured pork        | KPLLSAETEKEMATMKEEF | QKTKDELAKSEAKRKELEEK |
| Stewed pork           | KPLLSAETEKEMATMKEEF | QKTKDELAKSEAKRKELEEK |

|                       |                      |                      |
|-----------------------|----------------------|----------------------|
| Raw pork              | MVTLLKEKNDLQLQVQAEAE | GLADAEERCDQLIKTKIQLE |
| Cooked pork           | MVTLLKEKNDLQLQVQAEAE | GLADAEERCDQLIKTKIQLE |
| Emulsion-type sausage | MVTLLKEKNDLQLQVQAEAE | GLADAEERCDQLIKTKIQLE |
| Dry-cured pork        | MVTLLKEKNDLQLQVQAEAE | GLADAEERCDQLIKTKIQLE |
| Stewed pork           | MVTLLKEKNDLQLQVQAEAE | GLADAEERCDQLIKTKIQLE |

|                       |                      |                      |
|-----------------------|----------------------|----------------------|
| Raw pork              | AKIKEVTERAEDEEEINAEL | TAKKRKLEDECSELKKDIDD |
| Cooked pork           | AKIKEVTERAEDEEEINAEL | TAKKRKLEDECSELKKDIDD |
| Emulsion-type sausage | AKIKEVTERAEDEEEINAEL | TAKKRKLEDECSELKKDIDD |
| Dry-cured pork        | AKIKEVTERAEDEEEINAEL | TAKKRKLEDECSELKKDIDD |
| Stewed pork           | AKIKEVTERAEDEEEINAEL | TAKKRKLEDECSELKKDIDD |

|                       |                      |                      |
|-----------------------|----------------------|----------------------|
| Raw pork              | LELTLAKVEKEKHATENKVK | NLTEEMAGLDETIAKLTKEK |
| Cooked pork           | LELTLAKVEKEKHATENKVK | NLTEEMAGLDETIAKLTKEK |
| Emulsion-type sausage | LELTLAKVEKEKHATENKVK | NLTEEMAGLDETIAKLTKEK |
| Dry-cured pork        | LELTLAKVEKEKHATENKVK | NLTEEMAGLDETIAKLTKEK |
| Stewed pork           | LELTLAKVEKEKHATENKVK | NLTEEMAGLDETIAKLTKEK |

**(26-30)**

|                       |                      |                    |
|-----------------------|----------------------|--------------------|
| Raw pork              | KALQEAHQOTLDDLQAEEDK | VNLTAKTKLEQQVDDLEG |
| Cooked pork           | KALQEAHQOTLDDLQAEEDK | VNLTAKTKLEQQVDDLEG |
| Emulsion-type sausage | KALQEAHQOTLDDLQAEEDK | VNLTAKTKLEQQVDDLEG |
| Dry-cured pork        | KALQEAHQOTLDDLQAEEDK | VNLTAKTKLEQQVDDLEG |
| Stewed pork           | KALQEAHQOTLDDLQAEEDK | VNLTAKTKLEQQVDDLEG |

|                       |                      |                      |
|-----------------------|----------------------|----------------------|
| Raw pork              | SLEQEKKLRMDLERAKRKLE | GDLKLAQESIMDIENEKQQL |
| Cooked pork           | SLEQEKKLRMDLERAKRKLE | GDLKLAQESIMDIENEKQQL |
| Emulsion-type sausage | SLEQEKKLRMDLERAKRKLE | GDLKLAQESIMDIENEKQQL |
| Dry-cured pork        | SLEQEKKLRMDLERAKRKLE | GDLKLAQESIMDIENEKQQL |
| Stewed pork           | SLEQEKKLRMDLERAKRKLE | GDLKLAQESIMDIENEKQQL |

|                       |                      |    |            |            |
|-----------------------|----------------------|----|------------|------------|
| Raw pork              | DEKLKKKEFEISNLQSKI   | ED | EQALAIQLQK | KIKELQARIE |
| Cooked pork           | DEKLKKKEFEISNLQSKI   | ED | EQALAIQLQK | KIKELQARIE |
| Emulsion-type sausage | DEKLKKKEFEISNLQSKI   | ED | EQALAIQLQK | KIKELQARIE |
| Dry-cured pork        | DEKLKKKEFEISNLQSKI   | ED | EQALAIQLQK | KIKELQARIE |
| Stewed pork           | DEKLKKKEFEISNLQSKIED |    | EQALAIQLQK | KIKELQARIE |

|                       |                      |        |                |
|-----------------------|----------------------|--------|----------------|
| Raw pork              | ELEEEIEAERASRAKAEKQR | SDLSRE | LEEISERLEEAGGA |
| Cooked pork           | ELEEEIEAERASRAKAEKQR | SDLSRE | LEEISERLEEAGGA |
| Emulsion-type sausage | ELEEEIEAERASRAKAEKQR | SDLSRE | LEEISERLEEAGGA |
| Dry-cured pork        | ELEEEIEAERASRAKAEKQR | SDLSRE | LEEISERLEEAGGA |
| Stewed pork           | ELEEEIEAERASRAKAEKQR | SDLSRE | LEEISERLEEAGGA |

|                       |           |            |   |                   |     |
|-----------------------|-----------|------------|---|-------------------|-----|
| Raw pork              | SAQIEMNKK | REAEFQKMR  | R | DLEEATLQHEATAAALR | KKH |
| Cooked pork           | SAQIEMNKK | KREAEFQKMR | R | DLEEATLQHEATAAALR | KKH |
| Emulsion-type sausage | SAQIEMNKK | KREAEFQKMR | R | DLEEATLQHEATAAALR | KKH |
| Dry-cured pork        | SAQIEMNKK | KREAEFQKMR | R | DLEEATLQHEATAAALR | KKH |
| Stewed pork           | SAQIEMNKK | KREAEFQKMR | R | DLEEATLQHEATAAALR | KKH |

**(31-35)**

|                       |                   |      |           |             |
|-----------------------|-------------------|------|-----------|-------------|
| Raw pork              | ADSV AELGEQIDNLQR | VKQK | LEKEKSEMK | MEIDDLASNME |
| Cooked pork           | ADSV AELGEQIDNLQR | VKQK | LEKEKSEMK | MEIDDLASNME |
| Emulsion-type sausage | ADSV AELGEQIDNLQR | VKQK | LEKEKSEMK | MEIDDLASNME |
| Dry-cured pork        | ADSV AELGEQIDNLQR | VKQK | LEKEKSEMK | MEIDDLASNME |
| Stewed pork           | ADSV AELGEQIDNLQR | VKQK | LEKEKSEMK | MEIDDLASNME |

|                       |      |                  |            |            |            |
|-----------------------|------|------------------|------------|------------|------------|
| Raw pork              | TVSK | AKGNLEKMCRTLEDQL | SELKSKEEEQ | QRLINDLTAQ |            |
| Cooked pork           | TVSK | AKGNL KMCRTLEDQL | SELKSKEEEQ | QRLINDLTAQ |            |
| Emulsion-type sausage | TVSK | AKGNLEKMCRTLEDQL | SELKSKEEEQ | QRLINDLTAQ |            |
| Dry-cured pork        | TVSK | AKGNLEKMCRTLEDQL | SELK       | SKEEEQ     | QRLINDLTAQ |
| Stewed pork           | TVSK | AKGNLEKMCRTLEDQL | SELK       | SKEEEQ     | QRLINDLTAQ |

|                       |                      |                      |
|-----------------------|----------------------|----------------------|
| Raw pork              | RGRLQTESGEFSRQLDEKEA | LVSQLSRGKQAYTQQIEELK |
| Cooked pork           | RGRLQTESGEFSRQLDEKEA | LVSQLSRGKQAYTQQIEELK |
| Emulsion-type sausage | RGRLQTESGEFSRQLDEKEA | LVSQLSRGKQAYTQQIEELK |
| Dry-cured pork        | RGRLQTESGEFSRQLDEKEA | LVSQLSRGKQAYTQQIEELK |
| Stewed pork           | RGRLQTESGEFSRQLDEKEA | LVSQLSRGKQAYTQQIEELK |

|                       |                      |                      |
|-----------------------|----------------------|----------------------|
| Raw pork              | RQLEEEIKAKNALAHALQSS | RHDCDLLREQYEEEQESKAE |
| Cooked pork           | RQLEEEIKAKNALAHALQSS | RHDCDLLREQYEEEQESKAE |
| Emulsion-type sausage | RQLEEEIKAKNALAHALQSS | RHDCDLLREQYEEEQESKAE |
| Dry-cured pork        | RQLEEEIKAKNALAHALQSS | RHDCDLLREQYEEEQESKAE |
| Stewed pork           | RQLEEEIKAKNALAHALQSS | RHDCDLLREQYEEEQESKAE |

|                       |                                            |
|-----------------------|--------------------------------------------|
| Raw pork              | LQRALSKANTEVAQWRTKYE TDAIQRTEEELEEAKKKLAQR |
| Cooked pork           | LQRALSKANTEVAQWRTKYE TDAIQRTEEELEEAKKKLAQR |
| Emulsion-type sausage | LQRALSKANTEVAQWRTKYE TDAIQRTEEELEEAKKKLAQR |
| Dry-cured pork        | LQRALSKANTEVAQWRTKYE TDAIQRTEEELEEAKKKLAQR |
| Stewed pork           | LQRALSKANTEVAQWRTKYE TDAIQRTEEELEEAKKKLAQR |

**(36-40)**

|                       |                                        |
|-----------------------|----------------------------------------|
| Raw pork              | LQAAEEHVAVNAKASLEK TKQRLQNEVEDMLDVERTN |
| Cooked pork           | LQAAEEHVAVNAKASLEK TKQRLQNEVEDMLDVERTN |
| Emulsion-type sausage | LQAAEEHVAVNAKASLEK TKQRLQNEVEDMLDVERTN |
| Dry-cured pork        | LQAAEEHVAVNAKASLEK TKQRLQNEVEDMLDVERTN |
| Stewed pork           | LQAAEEHVAVNAKASLEK TKQRLQNEVEDMLDVERTN |

|                       |                                           |
|-----------------------|-------------------------------------------|
| Raw pork              | AACAALDKKQRNFDKILAEW KQKYEETHAELEASQKEARS |
| Cooked pork           | AACAALDKKQRNFDKILAEW KQKYEETHAELEASQKEARS |
| Emulsion-type sausage | AACAALDKKQRNFDKILAEW KQKYEETHAELEASQKEARS |
| Dry-cured pork        | AACAALDKKQRNFDKILAEW KQKYEETHAELEASQKEARS |
| Stewed pork           | AACAALDKKQRNFDKILAEW KQKYEETHAELEASQKEARS |

|                       |                                             |
|-----------------------|---------------------------------------------|
| Raw pork              | LGTELFKMK NAYEESLDQLE TLKRENK NLQQEISDLTEQI |
| Cooked pork           | LGTELFKMK NAYEESLDQLE TLKRENK NLQQEISDLTEQI |
| Emulsion-type sausage | LGTELFKMK NAYEESLDQLE TLKRENK NLQQEISDLTEQI |
| Dry-cured pork        | LGTELFKMK NAYEESLDQLE TLKRENK NLQQEISDLTEQI |
| Stewed pork           | LGTELFKMK NAYEESLDQLE TLKRENK NLQQEISDLTEQI |

|                       |                                          |
|-----------------------|------------------------------------------|
| Raw pork              | AEGGKRIHELEKIKKQVEQE KSEIQAALEEAASLEHEEG |
| Cooked pork           | AEGGKRIHELEKIKKQVEQE KSEIQAALEEAASLEHEEG |
| Emulsion-type sausage | AEGGKRIHELEKIKKQVEQE KSEIQAALEEAASLEHEEG |
| Dry-cured pork        | AEGGKRIHELEKIKKQVEQE KSEIQAALEEAASLEHEEG |
| Stewed pork           | AEGGKRIHELEKIKKQVEQE KSEIQAALEEAASLEHEEG |

|                       |                                            |
|-----------------------|--------------------------------------------|
| Raw pork              | KILRIQLELNQVKSEVDRKI AEKDEEIDQLKRNHVR VVES |
| Cooked pork           | KILRIQLELNQVKSEVDRKI AEKDEEIDQLKRNHVR VVES |
| Emulsion-type sausage | KILRIQLELNQVKSEVDRKI AEKDEEIDQLKRNHVR VVES |
| Dry-cured pork        | KILRIQLELNQVKSEVDRKI AEKDEEIDQLKRNHVR VVES |
| Stewed pork           | KILRIQLELNQVKSEVDRKI AEKDEEIDQLKRNHVR VVES |

**(41-45)**

|                       |                                           |
|-----------------------|-------------------------------------------|
| Raw pork              | MQSMLDAEIRSRNDAIRLKK KMEGDLNEMEIQLNHANRMA |
| Cooked pork           | MQSMLDAEIRSRNDAIRLKK KMEGDLNEMEIQLNHANRMA |
| Emulsion-type sausage | MQSMLDAEIRSRNDAIRLKK KMEGDLNEMEIQLNHANRMA |
| Dry-cured pork        | MQSMLDAEIRSRNDAIRLKK KMEGDLNEMEIQLNHANRMA |
| Stewed pork           | MQSMLDAEIRSRNDAIRLKK KMEGDLNEMEIQLNHANRMA |

|                       |                      |              |                      |
|-----------------------|----------------------|--------------|----------------------|
| Raw pork              | AEALRNYRNTQGILKDTQIH | LDDALRGQEDLK | EQLAMVER             |
| Cooked pork           | AEALRNYRNTQGILK      | DTQIH        | LDDALRGQEDLKEQLAMVER |
| Emulsion-type sausage | AEALRNYRNTQGILK      | DTQIH        | LDDALRGQEDLKEQLAMVER |
| Dry-cured pork        | AEALRNYRNTQGILK      | DTQIH        | LDDALRGQEDLKEQLAMVER |
| Stewed pork           | AEALRNYRNTQGILK      | DTQIH        | LDDALRGQEDLKEQLAMVER |

|                       |               |         |     |               |      |
|-----------------------|---------------|---------|-----|---------------|------|
| Raw pork              | RANLLQAEIEELR | ATLEQTE | RSR | KVAEQELLDASER | VQLL |
| Cooked pork           | RANLLQAEIEELR | ATLEQTE | RSR | KVAEQELLDASER | VQLL |
| Emulsion-type sausage | RANLLQAEIEELR | ATLEQTE | RSR | KVAEQELLDASER | VQLL |
| Dry-cured pork        | RANLLQAEIEELR | ATLEQTE | RSR | KVAEQELLDASER | VQLL |
| Stewed pork           | RANLLQAEIEELR | ATLEQTE | RSR | KVAEQELLDASER | VQLL |

|                       |             |           |               |         |
|-----------------------|-------------|-----------|---------------|---------|
| Raw pork              | HTQNTSLINTK | KKLETDISQ | MQGEMEDILQEAR | NAEEKAK |
| Cooked pork           | HTQNTSLINTK | KKLETDISQ | MQGEMEDILQEAR | NAEEKAK |
| Emulsion-type sausage | HTQNTSLINTK | KKLETDISQ | MQGEMEDILQEAR | NAEEKAK |
| Dry-cured pork        | HTQNTSLINTK | KKLETDISQ | MQGEMEDILQEAR | NAEEKAK |
| Stewed pork           | HTQNTSLINTK | KKLETDISQ | MQGEMEDILQEAR | NAEEKAK |

|                       |                 |       |       |                 |
|-----------------------|-----------------|-------|-------|-----------------|
| Raw pork              | KAITDAAMMAEELKK | EQDTS | AHLER | MKKNMEQTVKDLQHR |
| Cooked pork           | KAITDAAMMAEELKK | EQDTS | AHLER | MKKNMEQTVKDLQHR |
| Emulsion-type sausage | KAITDAAMMAEELKK | EQDTS | AHLER | MKKNMEQTVKDLQHR |
| Dry-cured pork        | KAITDAAMMAEELKK | EQDTS | AHLER | MKKNMEQTVKDLQHR |
| Stewed pork           | KAITDAAMMAEELKK | EQDTS | AHLER | MKKNMEQTVKDLQHR |

**(46-49)**

|                       |            |            |                      |
|-----------------------|------------|------------|----------------------|
| Raw pork              | LDEAEQLALK | GGKKQIQKLE | ARVRELEGEVESEQKRNAEA |
| Cooked pork           | LDEAEQLALK | GGKKQIQKLE | ARVRELEGEVESEQKRNAEA |
| Emulsion-type sausage | LDEAEQLALK | GGKKQIQKLE | ARVRELEGEVESEQKRNAEA |
| Dry-cured pork        | LDEAEQLALK | GGKKQIQKLE | ARVRELEGEVESEQKRNAEA |
| Stewed pork           | LDEAEQLALK | GGKKQIQKLE | ARVRELEGEVESEQKRNAEA |

|                       |                      |                      |
|-----------------------|----------------------|----------------------|
| Raw pork              | VKGLRKHERRVKELTYQTEE | DRKNILRLQDLVDKLQAKVK |
| Cooked pork           | VKGLRKHERRVKELTYQTEE | DRKNILRLQDLVDKLQAKVK |
| Emulsion-type sausage | VKGLRKHERRVKELTYQTEE | DRKNILRLQDLVDKLQAKVK |
| Dry-cured pork        | VKGLRKHERRVKELTYQTEE | DRKNILRLQDLVDKLQAKVK |
| Stewed pork           | VKGLRKHERRVKELTYQTEE | DRKNILRLQDLVDKLQAKVK |

|                       |                      |                     |
|-----------------------|----------------------|---------------------|
| Raw pork              | SYKRQAEAEAEQSNTNLSKF | RKLQHELEEAERADIAESQ |
| Cooked pork           | SYKRQAEAEAEQSNTNLSKF | RKLQHELEEAERADIAESQ |
| Emulsion-type sausage | SYKRQAEAEAEQSNTNLSKF | RKLQHELEEAERADIAESQ |
| Dry-cured pork        | SYKRQAEAEAEQSNTNLSKF | RKLQHELEEAERADIAESQ |
| Stewed pork           | YKRQAEAEAEQSNTNLSKF  | RKLQHELEEAERADIAESQ |

|                       |                       |
|-----------------------|-----------------------|
| Raw pork              | VNKL RVKSREVHTK VISEE |
| Cooked pork           | VNKL RVKSREVHTK VISEE |
| Emulsion-type sausage | VNKL RVKSREVHTK VISEE |
| Dry-cured pork        | VNKL RVKSREVHTK VISEE |
| Stewed pork           | VNKL RVKSREVHTK VISEE |
